# Supplementary material for: Mercury fluxes, budgets and pools in forest ecosystems of China: A critical review
Source: Copernicus journal article supplement (doi:10.5194/acp-2017-794), 2018-04-23
Supplement: Supplementary file [file acp-2017-794-AC1-supplement.pdf]

## Reply to Comments from Reviewer #1

We thank the editor and reviewers' comments that help us improve the manuscript. We have carefully revised our manuscript following the reviewers' comments. A point-to-point response is given below. The reviewers' comments are in black and our replies and changes in the manuscript are in blue.

### To Reviewer

#### Major Comment:

The manuscript by Zhou et al. attempts to “provide a better understanding of current knowledge with respect to forest Hg in China and quantify the forest act as net sinks or sources of GEM” and discuss the ecological risk of Hg accumulation in forest ecosystems. Although the authors provide a reasonable summary regarding Hg concentrations in streams with associated “export” fluxes (this is perhaps an ill-defined term by the authors since there is no sufficient evidence that the Hg measured in streams represent “removal” or “export” of Hg from the environmental systems under discussion) and present simplified graphic illustrations for Hg mass balance in various type of forest ecosystems, the manuscript has major deficiencies that do not meet the publication standards of Atmospheric Chemistry and Physics.

#### Response:

The reviewer think that the current manuscript does not meet the publication standards of *Atmospheric Chemistry and Physics*, but we completely disagreed with the reviewer. This manuscript has provided important information on the current knowledge with respect to forest Hg in China and quantified the forest act as net sinks or sources of GEM, as the Hg emission from the earth surface has a large uncertainty ranges between  $-513$  to  $1353 \text{ Mg yr}^{-1}$  suggested by a recent review article (Agnan et al., 2016). The review also suggested that the largest uncertainty of natural Hg emission source was resulted from what degree forests are net sinks or sources of GEM. Therefore, the current study focused on the Hg budget in the forest partly help dissolve the question: what degree the ecosystems are net sinks or sources of atmospheric Hg. Additionally, model of Hg dynamics used in North America and Europe could not suit China, because China is the largest emitting country of anthropogenic Hg source and the parameters differed significantly. We find that the Hg retention in forests in China is much

30 higher than the model estimated. Thus we think the manuscript can be potentially published in the  
31 *Atmospheric Chemistry and Physics*.

32 Additionally, the reviewer think that the Hg concentrations in streams with associated export  
33 fluxes was incorreced, but all the literatures about Hg export or balance in forest around the world  
34 suggested that the stream runoffs was an important export pathway of Hg from forest, such as forested  
35 watersheds in Alaska (Vermilyea et al., 2017), forested watershed of the Adirondack Mountains  
36 (Gerson et al., 2016), forests in north-central Sweden (Kronberg et al., 2016), all the forests discussed  
37 in the manuscript and so on. Therefore, there is no doubt that Hg in streams was an important export  
38 fluxes from the forests.

39

40 ***Comment #1:***

41 First of all, I am not sure if the review paper is needed given the information already available in  
42 the literature. Even somewhat disturbing, after carefully reviewing the data presented in Table 1, Table  
43 3, Figures 1-3 and part of Figures 4&5, a majority of the data appears to be repeating what has been  
44 presented in the text and SI Fu et al. (2015, ACP) and Wang et al. (2016, ES&T). The discussion  
45 provided for these tables and figures are also similar to the arguments provided by the two references.  
46 There is little new insight in the discussion of the manuscript.

47 **Response:**

48 We are completely disagree with the reviewers. The main data in the current manuscript was  
49 firstly reviewed (**Table 2&3, Fig. 2 and Fig. 4, 5&6**). Only a little data in the current manuscript  
50 overlapped in **Table 1 and Fig. 1&3**, but the data in the current review updates the data in the two  
51 studies (Wang et al., 2016; Fu et al., 2015). The data of mercury outputs, soil Hg storage, risks were  
52 firstly reviewed in the current study. Details shows in below:

53 It should be noted that the focus and content in the current manuscript are significantly different  
54 from the two researches (Wang et al., 2016; Fu et al., 2015). Wang et al. (2016) assess mercury  
55 deposition by litterfall through models, and Fu et al. (2015) mainly discussed the status of atmospheric  
56 concentrations based on observations in China and only a simple description on Hg deposition  
57 observed in China, which did not focus on forested areas. However, our manuscript was mainly focus

58 on the Hg budgets (input and output) and risks assessment in forested areas of China; therefore, the  
59 Hg input by atmospheric depositions must be detailed in the current review.

60 **In the Table 1 and Fig. 1**, we reviewed the data on the Hg input to the forests of China, we know  
61 that some of the data was also reviewed by Fu et al. (2015) and Wang et al. (2016); however, Fu et al.  
62 (2015) mainly focused on the higher Hg deposition fluxes associated with higher GEM/TGM  
63 concentrations and Wang et al. (2016) focused on the Hg deposition fluxes around the world by models.  
64 Additionally, we have updated the data in the two researches. For example, the two researches only  
65 reviewed 5 or 6 litterfall deposition fluxes in China, but we have reviewed 22 litterfall deposition  
66 fluxes in China. Therefore, we think that the data was not a repetition of previous review and the  
67 current review was a more systematic study focused on the Hg input to forested areas in China.

68 The reviewer also suggested that the data **in Table 3** was also repeating what has been presented  
69 in the text and SI Fu et al. (2015) and Wang et al. (2016). However, by carefully reviewing the two  
70 researches, we cannot find any data in the Table 3 was reviewed by the two researches. Therefore,  
71 the repetition does not exist.

72 **In Fig. 2**, we found that annual mean atmospheric TGM/GEM concentrations were significantly  
73 correlated with the THg concentrations in litterfall samples, and we believed that the data was firstly  
74 discussed in the current review. Therefore, no repetition exist.

75 **Fig. 3** showed correlations between litterfall deposition fluxes of Hg and mass-weighted mean  
76 Hg concentrations in litterfall and litterfall biomass. Wang et al. (2015) also showed the correlations,  
77 but only **5 pairs of datasets in China** were reviewed in their study and their conclusion was mainly  
78 resulted from the data of North America and Europe. The atmospheric Hg concentrations in China was  
79 much higher than those in North America and Europe and spatial variation was large in China.  
80 Additionally, **the current study reviewed 19 pairs of datasets in China**, which significantly  
81 improved the data and conclusion in China.

82 The reviewer also suggested that part of **Fig. 4 & 5** is repeating what has been presented in the  
83 text and SI Fu et al. (2015, ACP) and Wang et al. (2016, ES&T). Through carefully reviewing the data  
84 and figures in the two researches, no repetition exist. No similar review of Hg inputs to forest  
85 ecosystems in China, Europe and North America (Fig. 4) was found in their studies. In the two reviews

86 (Wang et al., 2016; Fu et al., 2015), there was no content about the soil-atmosphere exchanges.  
87 Therefore, no repetition exist in Fig. 4 & 5.

88

89 **Comment #2:**

90 The claim of "serious ecological risks" is an overstatement without clear evidence. The analysis  
91 is purely based on potential occurrence of forest fire events and the quantity of Hg storage. In fact,  
92 there are few documented cases of Hg pollution of ecological significance caused by forest fires.  
93 Should there be fire events, Hg pollution is not likely to be the primary factor leading to negative  
94 impacts to the ecosystem. There is no formal risk assessment component in the entire section 5.3 and  
95 the discussion in most based on what has been provided in the cited literature.

96 **Response:**

97 Firstly, according to the reviewer's suggestion before the manuscript published in the ACPD, the  
98 statement of "serious ecological risks" has been revised throughout the manuscript.

99 Secondly, currently, there was no direct measurement of Hg emission from the wildfires in China  
100 and as the reviewer suggested that few documented cases of Hg pollution of ecological significance  
101 caused by forest fires, so the detailed about Hg emission from the forest fires was deleted throughout  
102 the manuscript.

103 Thirdly, the reviewer suggested that there was no formal risk assessment component in the entire  
104 section, so we have added the risk assessment of Hg intake by consumers. The risk assessment of Hg  
105 intake is added as below:

106 "The chronic dietary intake (CDI,  $\mu\text{g kg}^{-1} \text{bw day}^{-1}$ ) of Hg depends on both the mushroom Hg  
107 concentrations (C) and the daily intake rates (IR), which are widely used to predict the exposure level  
108 of humans to trace elements(Du et al., 2016; Zhou et al., 2018). According to the Exposure Factors  
109 Handbook of the US Environmental Protection Agency, the CDI can be calculated as

$$110 \quad \text{CDI} = \sum (C \times \text{IR}) / \text{BW} \quad (1)$$

111 where *BW* (kg) is body weight. The IR was assumed as  $43 \text{ g day}^{-1}$  and the bw was assumed as  $60 \text{ kg}$   
112 for Chinese residents according to the previous studies in Yunnan province (Kojta et al., 2015;  
113 Falandysz et al., 2015a, b, 2016).

114 According to the *CDI* of mushroom consumptions, a Hazard Quotient (*HQ*) indicating the non-

115 carcinogenic health risk during a lifetime can be calculated by dividing the *CDI* by the toxicity  
 116 threshold value of the reference dose (*RfD*).

$$117 \quad HQ = CDI/RfD \quad (2)$$

118 The recommended *RfD* of Hg by Joint Food and Agriculture Organization (FAO)/WHO Expert  
 119 Committee on Food Additives is  $0.57 \mu\text{g kg}^{-1} \text{bw day}^{-1}$  (JECFA 2010). When the *HQ* is  $\leq 1$ , the adverse  
 120 health effects are unlikely experienced, whereas the value  $> 1$  indicates potential non-carcinogenic  
 121 effects. Based on the averaged Hg concentrations in the mushrooms from five studies in subtropical  
 122 forests of China, all the values of *HQ* showed  $> 1$ , demonstrating a much higher non-carcinogenic risk  
 123 to consumers caused by daily intake of Hg through mushroom ingestions (Table S2). The result  
 124 suggested the need for greater focus on the adverse health effects induced by Hg on the consumers in  
 125 China.”

126

127 **See the revised manuscript, line 644-662 and Table S2 in Supporting Information.**

128

129 **Table S2.** Hg concentrations ( $\mu\text{g g}^{-1}$ ) in mushrooms and dietary intake risks in China.

| Site                           | Species                         | Altitude<br>(m a.s.l) | Location<br>Type | Study<br>period    | THg<br>concentration | IR | CDI  | HQ   | References                     |
|--------------------------------|---------------------------------|-----------------------|------------------|--------------------|----------------------|----|------|------|--------------------------------|
| Mt.<br>Gongga                  | <i>Gymnopus<br/>erythropus</i>  | 2947.8                | Remote           | September,<br>2012 | 2.36                 | 43 | 1.67 | 2.9  | Falandysz<br>et al., 2014      |
| Mt.<br>Gongga                  | <i>Marasmius<br/>dryophilus</i> | 2947.8                | Remote           | September,<br>2012 | 0.87                 | 43 | 0.62 | 1.1  | Falandysz<br>et al., 2014      |
| Yunnan<br>Province             | Fungi genus<br><i>Xerocomus</i> | 2000-<br>4200         | Remote           | 2011–2014          | 0.86                 | 43 | 0.62 | 1.1  | Kojta et al.,<br>2015          |
| Mt.<br>Gongga<br>and<br>Yunnan | 27 species                      | 2000-<br>4200         | Remote           | 2012–2014          | 1.48                 | 43 | 1.06 | 1.86 | Falandysz<br>et al., 2016      |
| Yunnan<br>Province             | Genus<br><i>Leccinum</i>        |                       | Remote           | 2011–2014          | 2.13                 | 43 | 1.53 | 2.67 | Falandysz<br>et al. ,<br>2015b |
| Yunnan<br>Province             | <i>Macrocybe<br/>gigantea</i>   |                       | Remote           | 2011-2013          | 1.05                 | 43 | 0.75 | 1.3  | Wiejak et<br>al., 2014         |

130

131 At last, the discussion based on what has been provided in the cited literature was deleted and the  
 132 data was summarized in the section 5. See the revised manuscript, line 625-668.

133 **Comment #3:**

134 There is little synthesis in the manuscript except Figure 6. Most of the text in the manuscript only  
135 re-states the information presented in the figures and tables, rather than providing new insights or  
136 specific views of the authors. What is the novelty and what are the new findings in this review?

137 **Response:**

138 We completely disagree with the reviewer. Only a little text in the manuscript re-states the  
139 information presented in the figures and tables and the main text are discussing the status of Hg in  
140 forested areas of China.

141 **In the section 2.** Processes of Hg input, only about 600 words are showing the results of Hg input  
142 to forests, while the total number of words is 2216. Additionally, the text of the 600 words were mainly  
143 in statistical analysis of the data in the figures and tables, but not re-state the information presented in  
144 the figures and tables as the reviewer suggested. The other 1600 words in this section are discussing  
145 why higher Hg input in China and the difference with North America and Europe.

146 **In the section 3.** Processes of Hg output, only about 300 words shows the results of Hg output  
147 from the forests, while the total number of words is 2286 in this section. Therefore, we believe that the  
148 main text does not re-state the information presented in the figures and tables, while the main text of  
149 this section is discussing the machine of Hg export from the forests.

150 **In the section 4.** Hg budgets, the main text shows the synthesis of section 2 and 3, so not any  
151 restatements of the information presented in the figures and tables is in this section.

152 **In the section 5.** Hg storage and risk assessment, about 400 words are showing the results of Hg  
153 storage in the forests, while the total number of words is 1716. Same as we stated above, the text of  
154 the 400 words were mainly in statistical analysis of the data in the figures and tables. In this section,  
155 we have compared the Hg pools in China with those in North America and Europe and presented the  
156 risks of Hg storages in the forest by a model.

157 **In the section 6.** Environmental implication and research needs **and 7.** Conclusions, both of the  
158 sections are summary, no information in these sections presented in the figures and tables, so no re-  
159 statements exist.

160 **The novelty of the current review** is that it has answered the question of what degree the forest  
161 ecosystems are net sinks or sources of atmospheric Hg, which was raised by a recent review article

162 (Agnan et al., 2016). Agnan et al. (2016) showed that the Hg emission from the earth surface has a  
163 large uncertainty ranges between  $-513$  to  $1353 \text{ Mg yr}^{-1}$  and the uncertainty was mainly from the forest,  
164 because forest acted as net sinks or sources of atmospheric Hg is unresolved.

165 **The new findings in this review** show below: **Firstly**, model of Hg dynamics used in North  
166 America and Europe dose not suit for China, because China is the largest emitting country of  
167 anthropogenic Hg source and the parameters differed significantly. A large underestimation of model  
168 estimation compared to the observation-based estimation from forest areas of China, and the current  
169 review suggests future model studies should consider the THg dry deposition in forested areas  
170 individually. **Secondly**, previous study showed forest ecosystems appear a net deposition of  $59 \text{ t yr}^{-1}$ .  
171 However, based on the field observations of THg retention in Chinese forests, the current review  
172 roughly estimates the THg retention in forest soils was  $69 \text{ t yr}^{-1}$  just in China, which was much higher  
173 than the global data of  $59 \text{ t yr}^{-1}$ . **Thirdly**, the large uncertainties of estimations by models are mainly  
174 resulted from the variation of reported atmospheric Hg uptake by foliage and the limited geospatial  
175 representation of available data, more studies on the Hg budget in forest are needed. **Fourthly**, the  
176 large “active” soil pool at forests is a potential short-term and long-term source of THg and MeHg to  
177 downstream aquatic ecosystems; however, there is no study reporting the accumulation of THg and  
178 MeHg in aquatic ecosystem after output from the forest ecosystem in China, the studies of which are  
179 needed.

180 **The detailed discussion shows in 670-703 in the manuscript.**

181

182 References:

- 183 Gerson, J.R., Driscoll, C.T., 2016. Is Mercury in a Remote Forested Watershed of the Adirondack Mountains  
184 Responding to Recent Decreases in Emissions? *Environmental Science & Technology* 50, 10943-10950.
- 185 Kronberg, R.-M., Drott, A., Jiskra, M., Wiederhold, J.G., Bjorn, E., Skyllberg, U., 2016. Forest harvest contribution  
186 to Boreal freshwater methyl mercury load. *Global Biogeochemical Cycles* 30, 825-843.
- 187 Vermilyea, A.W., Nagorski, S.A., Lamborg, C.H., Hood, E.W., Scott, D., Swarr, G.J., 2017. Continuous proxy  
188 measurements reveal large mercury fluxes from glacial and forested watersheds in Alaska. *Science of the Total*  
189 *Environment* 599, 145-155.

190

191 **Mercury fluxes, budgets and pools in forest ecosystems of China: A critical review**

192

193 Jun Zhou <sup>a, b, e, \*</sup>, Buyun Du <sup>c</sup>, Zhangwei Wang <sup>d</sup>, Lihai Shang <sup>c</sup>, Xingjun Fan <sup>b</sup>, Jing Zhou <sup>a, e, \*</sup>

194

195 a. Key Laboratory of Soil Environment and Pollution Remediation, Institute of Soil Science, Chinese Academy of  
196 Sciences, Nanjing 210008, China.

197 b. College of Resource and Environment, Anhui Science and Technology University, Fengyang, Anhui 233100, P. R.  
198 China

199 c. State Key Laboratory of Environmental Geochemistry, Institute of Geochemistry, Chinese Academy of Sciences,  
200 Guiyang 550081, China.

201 d. National Engineering and Technology Research Center for Red Soil Improvement, Red Soil Ecological Experiment  
202 Station, Chinese Academy of Sciences, Yingtan 335211, China.

203 e. Research Center for Eco-Environmental Sciences, Chinese Academy of Sciences, Beijing 100085, China.

204

205 Correspondence to: Jun Zhou (zhoujun@issas.ac.cn); Jing Zhou (zhoujing@issas.ac.cn)

206



207       **Abstract:** Mercury (Hg) accumulation and retention in forest ecosystems play a key role in global biogeochemical  
208 cycling of Hg. Especially in China, forests are suffering highly elevated Hg loads. Numerous studies have been  
209 conducted to characterize the fluxes and pools of Hg in the terrestrial forests in China during the past decade, which  
210 provide insights into spatial distributions and estimate the Hg mass balance in forests through observations at widely  
211 diverse subtropical and temperate locations. In this paper, we present a comprehensive review of the research status  
212 of forest Hg in China to characterize the Hg budgets and pools. Averaged total Hg (THg) inputs at remote forests and  
213 rural & suburban forests in China are about 2 to 4-fold and 2.5 to 5-fold higher than the observed values in Europe  
214 and North America, respectively. The highly elevated THg inputs are mainly derived from the elevated atmospheric  
215 Hg concentrations. Additionally, production of litterfall biomass is showed to be an important influential factor  
216 raising the high Hg inputs at subtropical forests. Compared to the input, THg outputs from the forest ecosystems are  
217 relative small, which results in large amount of Hg resided in the forest soils. The annual THg retentions range from  
218 26.1 to 60.4  $\mu\text{g m}^{-2}$  at subtropical forests and from 12.4 to 26.2  $\mu\text{g m}^{-2}$  at temperate forests of China, which are about  
219 3.8- to 7.9-fold and 1.2 to 2.8-fold higher compared to those in North America. Given the large areal coverage, THg  
220 retention in forest is appropriately 69  $\text{t yr}^{-1}$  in China and is much high than that in global scale estimated by models.  
221 The much higher THg retention has elevated the THg pools in [Chinese](#) subtropical forests, which poses a threat for  
222 Hg pulses remitted back to the atmosphere and additional ecological risks in the forest. [The current study has](#)  
223 [implication for the role of China forests in the global Hg biogeochemical cycle and the optimization of atmospheric](#)  
224 [Hg transport and deposition models.](#)

225       **Keywords:** Trace metals; Atmospheric deposition; Input–output; Storage; Risk assessment

226

## 227 1. Introduction

228 Mercury (Hg) is considered as a highly toxic heavy metal due to its biogeochemical properties and its toxicity  
229 that can affect the health of human and ecosystems (Kojta et al., 2015; Falandysz et al., 2015a; Zhou et al., 2015b;  
230 Du et al., 2016). Unlike other heavy metals, atmospheric Hg may exist three operational Hg forms: gaseous elemental  
231 Hg (GEM); gaseous oxidized Hg (GOM, also known as reactive gaseous Hg); and particulate-bound Hg (PBM)  
232 (Lindberg and Stratton, 1998; Fu et al., 2015). Due to its strong stability and low water solubility, GEM is the most  
233 abundant (more than 90%) in the atmosphere and has long resistance time of 2.7 months–2 years, which can be  
234 transported globally and deposited to the remote eco-environment (Zhou et al., 2017a; Horowitz et al., 2017).  
235 Atmospheric Hg deposition to terrestrial and aquatic ecosystems plays a significant role in the global biogeochemical  
236 cycling of Hg (Zhou et al., 2013a; Blackwell and Driscoll, 2015a). Consequently, an understanding of how Hg is  
237 transported, deposited and circled the globe is significant for a full understanding and quantifying of Hg  
238 biogeochemical cycles (Fisher and Wolfe, 2012; Amos et al., 2013).

239 Atmospheric Hg is nearly the exclusive source of Hg in forest biomass due to the limitation of root uptake (Grigal,  
240 2003). The forest canopy is a major receptor of Hg in terrestrial forest ecosystems, which can absorb Hg through  
241 stomatal uptake of GEM, and adsorb PBM and GOM onto foliage surface (Fu et al., 2015). Therefore, atmospheric  
242 deposition by litterfall and throughfall is the largest input of Hg to forested watersheds that are not affected by natural  
243 geologic or point sources (Blackwell and Driscoll, 2015b; Zhou et al., 2016b; Wang et al., 2016a). Forest ecosystems  
244 are considered as a large sink of atmospheric Hg and an active pool of Hg, which is a vital part in the global Hg cycle  
245 (Friedli et al., 2007; Wang et al., 2016a; Ma et al., 2016). Additionally, the large amounts of Hg inputted to the forest  
246 are sequestered in the vegetation and soils, and have produced ecological risks on the bioaccumulation of Hg in the  
247 internal forest. For example, Hg sequestered in the forest soil are considered as potential sources of both total Hg  
248 (THg) and methylmercury (MeHg) to downstream aquatic ecosystems (Selvendiran et al., 2008; Ma et al., 2015).  
249 Moreover, Hg in the forest soil and biomass can be directly used by forest animals that may be highly vulnerable to  
250 the increasing Hg loads (Rimmer et al., 2010; Zhou et al., 2016a).

251 Dynamic and budget studies quantifying Hg flux and pool in the terrestrial forests are necessary for investigating  
252 status of Hg inputs to, retention within, and output from forest ecosystems. Many studies have improved our  
253 knowledge of current Hg pools and fluxes (Grigal et al., 2000; Grigal, 2003; Larssen et al., 2008; Ma et al., 2015).  
254 However, terrestrial forest has constantly been underestimated as sink for atmospheric Hg on a global scale (Wang  
255 et al., 2016b; Obrist, 2007). Previous reviews were mainly focused on the atmospheric Hg concentrations (Fu et al.,

256 2015), atmospheric Hg depositions (Wang et al., 2016a; Wright et al., 2016) and air–surface fluxes (Zhu et al., 2016);  
257 however, no studies aimed at the Hg budgets and quantified the Hg retention in the forest ecosystems. Agnan et al.  
258 (2016) suggested that the earth’s surface contributed to half of the global natural emissions (607 Mg yr<sup>-1</sup>); however,  
259 the estimated value had a large uncertainty ranges between –513 to 1353 Mg yr<sup>-1</sup>, due to what degree forests are net  
260 sinks or sources of GEM. China, the largest emitting country of anthropogenic Hg source, has done quite a lot of  
261 works to positioning the role of forests in the regional- and global-scale Hg biogeochemical cycles. In order to provide  
262 a better understanding of current knowledge with respect to forest Hg in China and quantify the forest act as net sinks  
263 or sources of GEM, we comprehensively review the forest Hg data in China to estimate the Hg mass balance in  
264 forests based on the observations. The important ecological risks of Hg accumulation and storage in forest are also  
265 presented. [The Hg budgets in forests partly help dissolve the question: what degree the ecosystems are net sinks or](#)  
266 [sources of atmospheric Hg. The implications and future research needs for further understanding of forest Hg in](#)  
267 [China are also presented.](#)

268

## 269 **2. Processes of Hg input**

### 270 2.1. Wet input

271 The THg and MeHg input fluxes by precipitation, throughfall and litterfall in forested area of China are showed  
272 in Table 1. The averaged THg and MeHg concentrations in precipitation sampled via wet-only precipitation sampling  
273 device at remote forests were 4.5 ng L<sup>-1</sup> ( $n = 4$ , range from 3.0 to 7.4 ng L<sup>-1</sup>) and 0.06 ng L<sup>-1</sup> ( $n = 2$ , range from 0.04  
274 to 0.08 ng L<sup>-1</sup>), respectively. Prospectively, the mean THg and MeHg concentrations in bulk precipitation samples  
275 at remote forests of China were 12.5 ng L<sup>-1</sup> ( $n = 3$ , range from 9.9 to 14.2 ng L<sup>-1</sup>) and 0.16 ng L<sup>-1</sup> ( $n = 1$ ), which  
276 were much higher than those collected by wet-only precipitation sampling devices (Table 1). Although the PBM and  
277 GOM in remote forests were relatively lower, dry deposition of PBM and GOM can also contribute to the elevation  
278 of Hg concentrations in bulk precipitation. At rural & suburban forests, the THg and MeHg concentrations were much  
279 higher in wet-only precipitation, with the average concentration range from 10.9 to 32.3 ng L<sup>-1</sup> ( $n = 5$ , mean = 18.1  
280 ng L<sup>-1</sup>) and range from 0.20 to 0.24 ng L<sup>-1</sup> ( $n = 2$ , mean = 0.22 ng L<sup>-1</sup>), respectively. Wet-only input fluxes of THg  
281 and MeHg were comparable and ranged from 5.4 to 6.1  $\mu\text{g m}^{-2} \text{yr}^{-1}$  ( $n = 4$ , mean = 5.8  $\mu\text{g m}^{-2} \text{yr}^{-1}$ ) and 0.06 to 0.14  
282  $\mu\text{g m}^{-2} \text{yr}^{-1}$  ( $n = 2$ , mean = 0.10  $\mu\text{g m}^{-2} \text{yr}^{-1}$ ) at remote sites, and ranged from 14.4 to 29  $\mu\text{g m}^{-2} \text{yr}^{-1}$  ( $n = 5$ , mean =  
283 18.1  $\mu\text{g m}^{-2} \text{yr}^{-1}$ ) and 0.26 to 0.36  $\mu\text{g m}^{-2} \text{yr}^{-1}$  ( $n = 2$ , mean = 0.31  $\mu\text{g m}^{-2} \text{yr}^{-1}$ ) at rural & suburban forests,  
284 respectively (Table 1). THg concentrations in precipitation and corresponding wet deposition fluxes at rural &

285 suburban forested areas were elevated compared to those in North America and Europe, but the concentrations and  
286 fluxes at remote forests were in the lower range of those obtained from remote forested areas in North America and  
287 Europe (Choi et al., 2008; Graydon et al., 2008).

288 Previous studies suggested that THg in rainwaters was originated from the scavenging of PBM and GOM in the  
289 atmosphere (Zhou et al., 2013a). Additionally, Fu et al. (2015) reviewed the THg fluxes in China and observed  
290 significant correlations between rainwater THg concentrations and GOM as well as PBM concentrations at urban,  
291 suburban and remote areas. However, THg concentrations in precipitations were not significantly correlated with the  
292 three Hg forms of GEM, PBM and GOM in the forested areas of China ( $n = 10, 4$  and  $4$ ; T test,  $p > 0.05$  for all). The  
293 reason may be that reduced PBM and GOM in forested areas resulted in low scavenging during wet deposition events  
294 (Seigneur et al., 2004). On the other hand, the vast majority of forest was at high altitude with low-level clouds,  
295 which limited the scavenging height and reduced the washout efficiency.

296

## 297 2.2. Throughfall and litterfall input

298 Throughfall and litterfall depositions are the two major pathways for Hg delivery to forest floor. Throughfall is  
299 rainfall that delivers to the forest floor after interacting with the forest canopy, which can wash off a large portion of  
300 the PBM and GOM deposited to forest leaves (Rea et al., 2000), resulting in higher THg and MeHg concentrations  
301 compared to those in precipitation. There are many factors influencing THg concentrations and depositions by  
302 throughfall, including canopy type (Demers et al., 2007), meteorological conditions (Blackwell and Driscoll, 2015b)  
303 and sample locations (Luo et al., 2015a). In addition, THg concentrations in precipitations also significantly affected  
304 these in throughfall due to similar source in both aqueous, which showed a significant positive correlation ( $n = 9$ ,  
305  $r^2 = 0.92$ ,  $p < 0.01$ ). The THg concentrations were ranged from 8.9 to 40.2  $\text{ng L}^{-1}$  ( $n = 3$ , mean = 28.6  $\text{ng L}^{-1}$ ) at remote  
306 forests and ranged from 20.1 to 69.7  $\text{ng L}^{-1}$  ( $n = 6$ , mean = 42.5  $\text{ng L}^{-1}$ ) at rural & suburban forests, which averaged  
307 2.6- and 2.0-fold compared to the corresponding THg concentrations in precipitation (Table 1).

308 The mean THg depositions by throughfall were 36.3  $\mu\text{g m}^{-2} \text{yr}^{-1}$  (rang of 10.5–57.1  $\mu\text{g m}^{-2} \text{yr}^{-1}$ ) at remote forests  
309 and 42.5  $\mu\text{g m}^{-2} \text{yr}^{-1}$  (rang of 21.8–71.3  $\mu\text{g m}^{-2} \text{yr}^{-1}$ ) at rural & suburban forests, respectively. The means of THg  
310 inputs are 2–3 times and 4–6 times higher than those of the European values (mean = 19.0  $\mu\text{g m}^{-2} \text{yr}^{-1}$ ) and the North  
311 America values (mean = 9.3  $\mu\text{g m}^{-2} \text{yr}^{-1}$ ), the ranges of which were between 12.0 and 40.1  $\mu\text{g m}^{-2} \text{yr}^{-1}$  and between  
312 2.07 and 25.4  $\mu\text{g m}^{-2} \text{yr}^{-1}$ , respectively (Fig. 4). At forests of China, throughfall contributed higher Hg inputs than  
313 those of wet inputs, with throughfall ranging from about 1.7 to 2.5 times the wet input (Fig. 1). However, these were

314 different with the North America forests, where throughfall Hg inputs were found to be lower than wet-only  
315 depositions in deciduous forests, but to be higher than wet-only depositions in coniferous forests (Wright et al., 2016).

316 Litterfall Hg inputs have been confirmed to be the other important pathway trapping atmospheric Hg to the forest  
317 floor via senesced leaves, needles, twigs, and branches, and other plant tissues. Concentrations of Hg in litterfall  
318 could be affected by many factors, such as tree species, lifespan, and environmental factors (e.g., solar irradiation,  
319 air temperature, altitude, etc.) (Blackwell and Driscoll, 2015b; Zhou et al., 2017a). However, atmospheric Hg  
320 concentrations play the most important role in Hg concentrations in litterfall, and Hg concentrations in atmosphere  
321 were deemed to be a good indicators of leaf Hg contents in forest areas (Fay and Gustin, 2007; Niu et al., 2011).  
322 Based on the available atmospheric total gaseous Hg (TGM) or GEM concentrations and litterfall Hg concentrations  
323 in 11 forested areas and 14 pairs of datasets in China, annual mean atmospheric TGM/GEM concentrations were  
324 significantly correlated with the THg concentrations in litterfall samples (Fig. 2). The significant correlation might  
325 verify that foliage can effectively trap Hg from the atmosphere by accumulation Hg through stomatal uptake of GEM  
326 (Fay and Gustin, 2007; Fu et al., 2010a, b; Zhou et al., 2017b). The mean THg and MeHg concentrations in litterfall  
327 at remote sites ranged from 12.6 to 135.1 ng g<sup>-1</sup> (mean = 54 ng g<sup>-1</sup>, n = 12) and from 0.28 to 0.48 ng g<sup>-1</sup> (mean =  
328 0.38 ng g<sup>-1</sup>, n = 2), respectively (Table 1). Such litterfall THg and MeHg concentrations were higher in rural &  
329 suburban areas, with mean concentration range of 25.8 to 176.1 ng g<sup>-1</sup> (mean = 61.2 ng g<sup>-1</sup>, n = 5) and 0.21 to 0.84  
330 ng g<sup>-1</sup> (mean = 0.52 ng g<sup>-1</sup>, n = 4), respectively. THg and MeHg concentrations in litterfall at rural & suburban areas  
331 of China were higher than those in North America and Europe, but litterfall concentrations of THg and MeHg at  
332 remote areas were compared those observed in North America and Europe, except in Mt. Leigong, Guizhou Province  
333 (Table 1, Fig. S1). Although Mt. Leigong was relatively isolated from anthropogenic activities with lower GOM,  
334 PBM, precipitation and throughfall Hg concentrations, GEM could undergo long-range transport from emission  
335 sources. The GEM concentration was 2.80 ng m<sup>-3</sup> in Mt. Leigong that is about 170 km to the large Hg mine of  
336 Wanshan (Fu et al., 2010a). The relatively higher GEM concentration resulted in elevated litterfall Hg concentrations.

337 Mean THg inputs by litterfall from 20 forests in China (41.8 μg m<sup>-2</sup> yr<sup>-1</sup>) were approximately 2 to 3 times higher  
338 than those in Europe over 11 sites (14.2 μg m<sup>-2</sup> yr<sup>-1</sup>) and more than 3 times higher than those in North America over  
339 37 sites (12.9 μg m<sup>-2</sup> yr<sup>-1</sup>) (Fig. 4). Since litterfall THg inputs to terrestrial ecosystems are estimated by multiplying  
340 the biomass and corresponding THg content in litterfall, both of them could influence the input fluxes. Therefore,  
341 compared to North America and Europe, higher TGM or GEM concentrations in rural & suburban forests of China  
342 resulted in the elevated litterfall Hg concentrations and corresponding higher fluxes in China. However, it should be

343 noted that the litterfall biomass productions in forests of China ( $565 \pm 450 \text{ g m}^{-2} \text{ yr}^{-1}$ ) were more than 2-fold higher  
344 than those observed in North America and Europe ( $200 \pm 145 \text{ g m}^{-2} \text{ yr}^{-1}$ ). The regional differences of litterfall Hg  
345 inputs to forest ecosystems was primarily resulted by the factor of litterfall biomasses rather than litterfall Hg  
346 concentrations, as evidenced by the much stronger correlation between litterfall Hg input fluxes and litter biomass  
347 productions than that with litterfall THg concentrations (Fig. 3a and b).

348 The total Hg input as the sum of Hg input by litterfall and throughfall (i.e., input flux by litterfall + input flux by  
349 throughfall) to forests were ranged from 47.7 to 291.3  $\mu\text{g m}^{-2} \text{ yr}^{-1}$  (n=11 from 9 forests) in China (Fig. 1). Here, it  
350 should be noted that the highest Hg deposition ( $291.3 \mu\text{g m}^{-2} \text{ yr}^{-1}$ ) was observed at Tieshanping forest from March  
351 2005 to March 2006 (Wang et al., 2009); however, due to overestimation of litterfall biomass, the measured Hg fluxes  
352 were more than 3 times the recent studies by Luo et al. (2015a) in 2010–2011 and Zhou et al. (2017b) in 2014–2015.  
353 The much higher Hg input at Tieshanping forest is due to it located near the center of Chongqing City (20 km), the  
354 annual atmospheric emissions of which just from coal combustion was 4.97 t (Wang et al., 2006) and Hg pollution  
355 was regarded as major environmental burdens in Chongqing (Yang et al., 2009). The large mercury emission resulted  
356 in much higher Hg deposition fluxes not only in the urban areas but also in the suburban areas (Ma, 2015; Wang et  
357 al., 2009, 2014). If we use the updated Hg inputs fluxes by Luo et al. (2015b) at Tieshanping forest, the annually  
358 mean total Hg input flux was  $73.9 \mu\text{g m}^{-2} \text{ yr}^{-1}$  (n=10) in China. Hg input to forest floor via litterfall was substantially  
359 comparable or greater than the throughfall input and the litterfall to throughfall input ratios range from 0.33 to 6.59  
360 (mean= 2.14), indicating that Hg input via litterfall surpassed that by throughfall and become the major pathway of  
361 Hg input to forests in China. The observed ratios in forest ecosystem of China were much greater than those observed  
362 in North America and Europe. Ratios of litterfall Hg input to throughfall Hg input to forest ecosystems were in the  
363 range of 0.27 to 1.56 (mean=0.89; n = 9) in Europe (Schwesig and Matzner, 2000; Hultberg et al., 1995; Iverfeldt et  
364 al., 1991; Larssen et al., 2008; Lee et al., 2000; Munthe et al., 1995, 1998; Schwesig and Matzner, 2001), and in the  
365 range of 0.60 to 4.13 in North America (mean = 1.37; n = 16) (Blackwell and Driscoll, 2015b; Choi et al., 2008;  
366 Demers et al., 2007; Kalicin et al., 2008; Kolka, 1999; Grigal et al., 2000; Lindberg et al., 1994; Fisher and Wolfe,  
367 2012; Rea et al., 1996, 2001; Johnson, 2002; Johnson et al., 2007; Nelson et al., 2007; St. Louis et al., 2001; Graydon  
368 et al., 2008), which was about 2.4 to 1.6 times lower compared to the ratios observed in China. The reason is the  
369 much higher litterfall biomass production in forest of China as we stated above.

370 Additionally, more than 90% of Hg in litterfall biomass is considered to be uptake from atmosphere, and  
371 throughfall can wash off most of the PBM and GOM on the leaf surface by previous dry depositions; therefore,

372 litterfall and throughfall Hg inputs could be a good indicator of TGM dry deposition to forest ecosystems (Zhou et  
373 al., 2013a; Fu et al., 2015). Considering dry Hg input in a forest ecosystem as the difference between total Hg input  
374 and wet Hg input (dry Hg input = total Hg input – wet Hg input), more than 80% of total Hg inputs were from dry  
375 inputs in forests of China, which was higher than those in North America and Europe (70%) but lower than those in  
376 Brazil (85%) (Wang et al., 2016).

377 Higher dry and wet depositions resulted in higher total Hg inputs to Chinese forests, which averaged  $78.4 \mu\text{g m}^{-2}$   
378  $\text{yr}^{-1}$  at remote forests and  $106.5 \mu\text{g m}^{-2} \text{yr}^{-1}$  at rural & suburban forests, and ranged from  $47.7$  to  $119.5 \mu\text{g m}^{-2} \text{yr}^{-1}$   
379 ( $n=5$ ) and from  $56.0$  to  $291.3 \mu\text{g m}^{-2} \text{yr}^{-1}$  ( $n=6$ ), respectively. We have also reviewed the THg inputs by throughfall  
380 and litterfall in the Europe and North America (Fig. 4), and the results showed that THg inputs were significantly  
381 lower than those observed in China ( $p<0.05$  for Europe and  $p<0.01$  for North America). Mean THg input was about  
382  $39.2 \mu\text{g m}^{-2} \text{yr}^{-1}$  ( $n=9$ ) in the Europe, which was about 2.0- and 2.5-fold lower than that observed at remote forests  
383 and rural & suburban forests in China. Even lower THg input was found in the North America ( $20.2 \mu\text{g m}^{-2} \text{yr}^{-1}$ ,  $n=$   
384  $17$ ) and was about 4- and 5-fold lower than that at remote forests and rural & suburban forests in China.

385

### 386 **3. Processes of Hg output**

#### 387 3.1. Exports from surface runoff and underground runoff

388 The dominate pathways of Hg output from forest catchments were runoffs and soil-atmosphere exchange fluxes.  
389 The output fluxes of THg and MeHg via surface runoff measured in China are showed in Table 2. The mean THg and  
390 MeHg concentrations in surface runoffs ranged from  $2.3$  to  $17.2 \text{ ng L}^{-1}$  (mean =  $6.0 \pm 4.1 \text{ ng L}^{-1}$ ,  $n=11$ ) and from  
391  $0.2$  to  $0.25 \text{ ng L}^{-1}$  (mean =  $0.23 \text{ ng L}^{-1}$ ,  $n=2$ ), respectively. Comparing to the THg ( $40.5 \pm 19.6 \text{ ng L}^{-1}$ ) and MeHg  
392 ( $0.32 \text{ ng L}^{-1}$ ) in throughfall, the corresponding Hg concentrations in surface runoffs were seemed much lower, which  
393 was consistent with the general concept that atmospherically deposited Hg accumulates in soils rather than being  
394 directly transported to streams (Larssen et al., 2008). The export fluxes of THg via surface runoffs and/or stream  
395 waters ranged from  $3.0$  to  $8.6 \mu\text{g m}^{-2} \text{yr}^{-1}$  (mean =  $4.8 \pm 2.6 \mu\text{g m}^{-2} \text{yr}^{-1}$ ,  $n=6$ ). Luo et al. (2014) collected 117  
396 stream water samples in China, including 42 streams from 9 sites in the northeastern forests and 75 streams from 16  
397 sites in the southern forests, and the result showed that THg concentration was higher in northeastern forests ( $17.2 \pm$   
398  $11.0 \text{ ng L}^{-1}$ ) than that in the southern forests ( $6.2 \pm 6.4 \text{ ng L}^{-1}$ ). The THg concentrations in stream water were  
399 positively correlated to DOC concentrations, suggesting that the DOC may facilitate the Hg mobility. Due to cool  
400 and dry climate in northern forests, litter decomposed more slowly and resulted in deeper litter and organic layers

401 than those in southern forests (Zhou et al., 2015a, 2017a). Therefore, soil erosion in northern forests with higher DOC  
402 in stream waters resulted in higher THg concentrations.

403 No statistically significant correlations were showed between THg concentrations in stream water and throughfall  
404 ( $r^2 = 0.00$ ,  $p > 0.05$ ,  $n = 9$ ), and between throughfall Hg inputs and stream water exports ( $r^2 = 0.03$ ,  $p > 0.05$ ,  $n = 6$ ),  
405 implying that THg output from stream water was regulated directly by processes other than current deposition input  
406 in these forested catchments. However, THg export fluxes via runoff and/or stream waters were significantly  
407 correlated with THg concentrations in surface soils (organic layer or top 10 cm) ( $r^2 = 0.52$ ,  $p < 0.05$ , Fig. S2). Higher  
408 THg depositions have resulted in much higher soil THg concentrations at forest sites of China. Although soils in  
409 forests have been suggested as filters between throughfall and stream waters, but THg in stream waters also can  
410 desorb from soils (Xue et al., 2013). Yin et al. (1997) suggested that higher Hg concentrations in the water of  
411 prefiltration and soils both could be resulted in higher Hg concentrations in the leachate. Therefore, higher soil Hg  
412 contents caused by higher deposition at forests of China caused high Hg concentrations in the stream water. Since  
413 the adsorption and desorption of THg in soils cloud also depend on other factors, including the soil physical and  
414 chemical properties (pH, organic matter, consistency) and leachate properties (pH, dissolved organic matter, salinity)  
415 (Yin et al., 1997; Xue et al., 2013), the deduction may have large uncertainties.

416 The direct measurements of THg in underground runoffs were not conducted in any forests of China, but they  
417 played important roles in the THg export from forests due to both of the amounts and THg concentrations usually  
418 higher than those of surface runoffs in subtropical forests (Liu, 2005; Luo et al., 2015b). Several studies have  
419 measured THg concentrations in solutions of soil profiles in subtropical forest of Tieshanping, which was averaged  
420  $21.8 \text{ ng L}^{-1}$  and ranged from  $1.98$  to  $60 \text{ ng L}^{-1}$  (Wang et al., 2009; Zhou et al., 2015; Luo et al., 2015b). The observed  
421 THg concentrations of soil solution was higher than those in five Swiss forest soils, and the reason may be due to  
422 higher THg loads and soil THg content in this Chinses forest. Although no studies directly measured the export flux  
423 of THg via underground runoff, we roughly estimated the flux based on the THg in soil solutions and runoff amount  
424 in Tieshanping forest, which is  $6.0 \text{ } \mu\text{g m}^{-2} \text{ yr}^{-1}$ ; therefore, the total Hg output by runoffs as the sum of Hg output by  
425 surface runoff ( $3.5 \text{ } \mu\text{g m}^{-2} \text{ yr}^{-1}$ ) and underground runoff ( $6.0 \text{ } \mu\text{g m}^{-2} \text{ yr}^{-1}$ ) was  $9.5 \text{ } \mu\text{g m}^{-2} \text{ yr}^{-1}$ .

426

### 427 3.2. Export of soil-atmosphere exchange fluxes

428 Table 3 shows the statistical summary of soil-atmosphere Hg exchange fluxes and associated site information in  
429 the 30 forest sites. Mean soil-atmosphere Hg exchange fluxes at remote forests were in the range of  $1.6$ – $4.77 \text{ ng m}^{-2}$



430  $\text{hr}^{-1}$  (mean =  $3.3 \pm 3.4 \text{ ng m}^{-2} \text{ hr}^{-1}$ ,  $n = 12$ ), and those at rural & suburban forests were significantly higher (T test,  $p$   
431  $< 0.05$ ) and ranged from  $-0.8$  to  $17.8 \text{ ng m}^{-2} \text{ hr}^{-1}$  (mean =  $8.3 \pm 7.1 \text{ ng m}^{-2} \text{ hr}^{-1}$ ,  $n = 18$ ). Generally, soil-atmosphere  
432 Hg exchange fluxes are bi-directional. Nevertheless, only one site showed overall net deposition of  $-0.8 \text{ ng m}^{-2} \text{ hr}^{-1}$   
433 in the wetland of Tieshanping forest and the other forest soils showed overall net emissions in China.

434 Many studies have identified factors that correlate with the magnitude and direction of soil-atmosphere Hg  
435 exchange fluxes, including atmospheric and soil physicochemical properties. The well-known factors studied in the  
436 previous researches influencing soil-atmosphere Hg exchange fluxes included substrate Hg concentration, air and  
437 soil temperature, measurement methodology, as well as environmental variables (e.g. forest type, terrain type and  
438 soil cover). The most commonly promoting  $\text{Hg}^0$  production is solar radiation that is reported with positive correlations  
439 in all the studied forests in China ( $n = 30$ ). The relationship is mainly attributed to photochemical reduction of soil-  
440 bound Hg, which converts soil  $\text{Hg}^{2+}$  to volatile  $\text{Hg}^0$  (Xin et al., 2007; Zhou et al., 2017b). Photo-reduction is a major  
441 driver of  $\text{Hg}^0$  generation and evasion from soils (Choi and Holsen, 2009; Zhou et al., 2015a, 2017b), although other  
442 abiotic and biotic processes also resulted in translation of  $\text{Hg}^{2+}$  to  $\text{Hg}^0$  production, including reduction by humic acids  
443 (Allard and Arsenie, 1991) and iron oxides under anoxic conditions (Lin and Pehkonen, 1997) as well as reduction  
444 by microorganisms (Agnan et al., 2016) and/or microbial exudates (Poullain et al., 2004, 2007). Additionally, other  
445 important correlation was identified with soil or air temperature, which is also significantly correlated to the  $\text{Hg}^0$   
446 production and observed with soil-atmosphere Hg flux in all the forests in China ( $n=30$ ). Soil temperature was  
447 generally stimulated directly to activation energy of  $\text{Hg}^0$  (Gustin et al., 1997; Edwards and Howard, 2013) or  
448 stimulation  $\text{Hg}^0$  evasion by action of soil microorganism activity (Pannu et al., 2014).

449 Agnan et al. (2016) showed that substrate Hg concentration was significantly correlated with soil-atmosphere Hg  
450 fluxes across Hg-enriched sites by large global data set ( $n = 538$ ), but an apparent lack of correlation between substrate  
451 Hg concentrations and soil-atmosphere Hg fluxes across all background soils ( $n = 307$ ) that defined as substrate Hg  
452 concentrations  $\leq 300 \text{ ng g}^{-1}$  and atmospheric  $\text{Hg}^0$  concentrations  $\leq 3 \text{ ng m}^{-3}$ . Across all vegetation-covered soils  
453 (forest and wetland) of China, the correlation between soil Hg concentrations and soil-atmosphere exchange fluxes  
454 also did not show significantly across the entire database ( $r^2 = 0.02$ ,  $p > 0.05$ ,  $n = 25$ ), which was consistent with the  
455 global database set in background soils (Agnan et al., 2016). The lack of correlation between substrate Hg  
456 concentrations and soil-atmosphere Hg fluxes may indicate either little control of soil Hg content on the exchange  
457 fluxes across forested areas, or that other parameters prevailed over the effects of soil Hg content. Alternatively, forest  
458 areas showed a much narrower range of soil Hg content compared to Hg-enriched substrates, which influenced the

459 fluxes inconspicuously. However, Zhou et al. (2016c) reported strongly positive correlations between soil Hg contents  
460 and fluxes at individual forest of Tieshanping subtropical forest ( $r^2=0.97$ ,  $p<0.001$ ) due to the sampling locations that  
461 were nearby and have similar other environmental factors.

462 According to the two-resistance exchange interface model, the exchange fluxes are caused by the gradient of  $Hg^0$   
463 concentrations on both interfaces (Zhang et al., 2002); therefore, high  $Hg^0$  concentrations in the atmosphere will  
464 reduce the potential of  $Hg^0$  produced in the soil and diffusion to atmosphere. Laboratory and field simulation studies  
465 showed that elevated atmospheric Hg concentrations significantly inhibited soil Hg volatilizations (Hanson et al.,  
466 1995; Poulain et al., 2004; Zhou et al., 2017b). Atmospheric compensation point for  $Hg^0$  flux was firstly presented  
467 by Hanson et al. (1995), which is the atmospheric Hg concentration at which no net flux occurs between soil and air  
468 (flux to be 0). A previous study using the global database set in background areas showed significant correlation  
469 between atmospheric Hg and soil-atmosphere exchange fluxes ( $p < 0.001$ ,  $n = 263$ ) (Agnan et al., 2016). In contrast,  
470 based on the database combining all forest-covered soils in China, correlation between atmospheric Hg  
471 concentrations and soil-atmosphere exchange fluxes was not significant ( $r^2 = 0.05$ ,  $p > 0.05$ ,  $n = 28$ ), which was  
472 inconsistent to the concept of the compensation point. The no correlation was contributed to the variations of  
473 environmental factors and Hg emissions at forest sites that resulted in a different buildup of GEM/TGM near the  
474 surface in the boundary layer. Thus, high soil emissions caused high GEM/TGM concentrations and not vice versa  
475 via a control of air GEM/TGM concentrations on soil-atmosphere exchange fluxes. However, in individual forests,  
476 studies showed that compensation points at subtropical forests were in the range of 3.89–6.90  $ng\ m^{-3}$  in Tieshanping  
477 forest stands (Du et al., 2014; Zhou et al., 2016c) and 7.75  $ng\ m^{-3}$  in Qianyanzhou forest (Luo et al., 2015a), which  
478 were much higher than that calculated according to the global database in background sites (2.75  $ng\ m^{-3}$ , Agnan et  
479 al., 2016). Higher compensation points observed in China also imply that natural surface contribute larger  
480 atmospheric Hg pools in China.

481 Additionally, studies have observed predictable influences of environmental variables on  $Hg^0$  exchange across  
482 multiple forests when using consistent measurement methodology, such as significant correlations with air relative  
483 humidity (Ma et al., 2013, 2015; Du et al., 2014; Luo et al., 2015a). However, it should be noted that the correlation  
484 between air humidity and air temperature were also observed, indicating that air temperature may control the air and  
485 soil humidity. Furthermore, soil moisture stimulated soil Hg emissions at Qianyanzhou and Zhuzhou forests (Luo et  
486 al., 2015a; Du et al., 2014) but reduced emissions at Tieshanping forest stands (Du et al., 2014; Zhou et al., 2016c).  
487 Previous studies suggested that soil moisture contributed to TGM flux had optimum interval and should be under

488 intermediate conditions, neither under fairly dry nor very wet (Lin et al., 2010; Pannu et al., 2014; Obrist et al., 2014;  
489 Zhou et al., 2017b), which can elucidate the different correlations at different forest ecosystems.

490 Fig. 5 shows the seasonal variations of soil-atmosphere Hg exchange fluxes at forest areas in China. The variations  
491 can be classified into two distinct types: evergreen forest and deciduous forest. At evergreen forests, the mean  
492 exchange fluxes in warm seasons (summer and spring) were relative higher than those in cold seasons (winter and  
493 autumn, T test:  $p < 0.05$  for all). Solar radiation over the forest canopy was much higher in the warm seasons, but the  
494 branches and leaves were also luxuriant, so soils received similar sunlight with other seasons at the subtropical  
495 evergreen forests (Ma et al., 2013). Therefore, elevated soil-atmosphere Hg exchange fluxes in warm seasons under  
496 the evergreen canopy were mainly caused by the increasing soil/air temperature. In contrast, in the deciduous forests,  
497 such as larch, mixed broadleaf forest and wetland in Mt. Dongling, the means of soil-atmosphere Hg exchange fluxes  
498 were significantly higher in cold seasons (leaf-off period) than that in the other seasons (T test:  $p < 0.01$ ). Solar  
499 radiation was the maximum amount reaching the forest floor during leaf-off periods in winter, which was  
500 approximately  $300 \text{ W m}^{-2}$  and promoted  $\text{Hg}^0$  production. Whereas during leaf-on periods in summer, the maximum  
501 solar radiation at the forest floor was only about  $116 \text{ W m}^{-2}$ .

502 In summary, our results suggested that soil-atmosphere Hg exchange fluxes are highly dependent on temperature  
503 at the evergreen forests, which increased the rate of reduction of  $\text{Hg}^{2+}$  by thermal processes, biological activities and  
504 stimulating  $\text{Hg}^0$  evasion (Poissant et al., 1998; Zhang et al., 2001; Choi and Holsen, 2009). In the deciduous forests,  
505 the fluxes were similar to evergreen forests during leaf-on periods, whereas the exchange fluxes are dependent on  
506 solar radiation during leaf-off periods because that can directly reach to the forest floor. Although soil received direct  
507 solar radiation at forests in north China during leaf-off periods that can be lasted for about half a year (November to  
508 April), the exchange fluxes displayed a spatial pattern with significantly lower fluxes in the temperate zones in north  
509 China than those at subtropical zones in south China (T test,  $p < 0.01$ ) due to lower temperature at temperate zones.  
510 Additionally, the remote forests in the temperate zones in north China had similar exchange fluxes to Europe and  
511 North America, due to similar forest type, soil properties, TGM concentrations and environmental factors at those  
512 forests. However, the fluxes at subtropical zones of remote, rural & suburban forests were generally higher compared  
513 to those observed in North America, Europe and South America. The reason may be that forest soils at these areas  
514 have higher THg concentrations and receive more solar radiation and causing higher temperature than those at boreal  
515 and temperate forests in Europe and North America.

516

#### 517 **4. Hg budgets**

518 The ultimate fate of Hg deposited to the forest ecosystem may depend on its delivery and incorporation into the  
519 forest floor. Input of THg to the forest fields included net throughfall and litterfall depositions and output pathway  
520 from the forest ecosystem included runoff outflow and soil Hg emission back to atmosphere (St. Louis et al., 2001;  
521 Fu et al., 2010a). A synthesis of Hg input into and output from forests, we conclude the Hg retentions in forest soils  
522 in four subtropical forests in south China, including Tieshanping forest, Mt. Gongga, Mt. Simian and Qianyanzhou  
523 forest (Fig. 6a). To identify how the Hg retention in the temperate forests in north China, we have also estimated the  
524 budgets in three forest stands at Mt. Dongling in north China (Fig. 6b).

525 Due to no studies estimated the THg export by underground runoff in China, the underground runoff fluxes in the  
526 four subtropical forests in south China was estimated according to the runoff amounts and THg concentrations. The  
527 runoff amount was estimated to 25% rainfall amount (Liu et al., 2005) and THg concentration in runoff was estimated  
528 to same as that in Tieshanping due to similar soil THg concentrations in these areas. The estimated export fluxes by  
529 underground runoffs were ranged 6.0 to 9.9  $\mu\text{g m}^{-2} \text{yr}^{-1}$  in the four forests. Base on the budget calculation, the THg  
530 retention (= throughfall + litterfall – runoff outflow (surface and underground) – soil-atmosphere exchange fluxes)  
531 at the subtropical forests ranged from 26.1 to 60.4  $\mu\text{g m}^{-2} \text{yr}^{-1}$ , accounted for ranging from 46.6% to 62.8% of THg  
532 inputs (Fig. 6a). Evasion of Hg from forest soil was the dominated pathway of THg outputs from the forest compared  
533 to runoff outflow. By comparison, the annual loading of THg to subtropical forests in China were much higher  
534 compared to some forest catchments in Europe and North America (Larssen et al., 2008; Grigal et al., 2000). Since  
535 atmospheric Hg distributions at subtropical areas indicated rural to suburban areas suffered heavy regional Hg  
536 emissions from industrial and urban areas (Fu et al., 2015), we infer anthropogenic emissions caused the elevated  
537 loading of Hg to subtropical forests in China.

538 In a study on Hg input at a remote temperate forest ecosystem in Mt. Changbai, northeastern China, THg  
539 concentrations in throughfall was approximately 17  $\text{ng L}^{-1}$  (Wan et al., 2009a). The forest types at Mt. Changbai  
540 were similar to Mt. Dongling in Beijing: mixed forest (600–1100 m a.s.l.), coniferous forest (1100–1700 m a.s.l.),  
541 and mountain birch zone (1700–2000 m a.s.l.). Additionally, the TGM concentrations were between  $1.60 \pm 0.51 \text{ ng}$   
542  $\text{m}^{-3}$  and  $3.58 \pm 1.78 \text{ ng m}^{-3}$  (Wan et al., 2009b; Fu et al., 2012), which were comparable with the concentration of  
543  $2.5 \pm 0.5 \text{ ng m}^{-3}$  at Mt. Dongling (Zhou et al., 2017a). If we hypothesized the THg concentration in throughfall at  
544 Mt. Dongling was also similar to that in Mt. Changbai and throughfall amount were estimated through the mean  
545 interception of water-holding capacity of canopy measured by Fei et al. (2011). The estimated inputs of THg

546 deposition were ranged from 21.40 to 28.73  $\mu\text{g m}^{-2} \text{yr}^{-1}$  at Mt. Dongling. As forest types in Mt. Dongling and  
547 Changbai are similar, the forest soil types are also similar, which are both mountain brown forest soil (Wang et al.,  
548 2013; Zhou et al., 2017a). Therefore, we also referred the Hg concentrations in runoff (5.75  $\text{ng L}^{-1}$ ) at Mt. Changbai  
549 (Wang et al., 2013) and runoff volume were used a previous study in the three stands at Mt. Dongling (Fei et al.,  
550 2011). Based on our measured THg concentrations in soil solution (9.2  $\text{ng L}^{-1}$ , our unpublished data) and the amounts  
551 of underground runoffs in the three stands (Wang et al., 2012), the export fluxes by underground runoffs were  
552 estimated. Studies in the Chinese pine plantation, larch plantation and mixed broad-leaved forest found that the annual  
553 emission by soil volatilization measured by dynamics chamber and were from 0.87 to 4.03  $\mu\text{g m}^{-2} \text{yr}^{-1}$  (Zhou et al.,  
554 2016c), and the total Hg outputs of which were 3.1, 2.5 and 9.0  $\mu\text{g m}^{-2} \text{yr}^{-1}$ , respectively. Therefore, the annual net  
555 retention Hg from the atmosphere was 21.7  $\mu\text{g m}^{-2} \text{yr}^{-1}$  for Chinese pine plantation, 26.2  $\mu\text{g m}^{-2} \text{yr}^{-1}$  for larch  
556 plantation and 12.4  $\mu\text{g m}^{-2} \text{yr}^{-1}$  for mixed broad-leaved forest in north China. The ratios of THg retentions to the THg  
557 inputs were much higher than these at subtropical forests (T test,  $p < 0.05$ ), which accounted for 57.9% to 91.3% of  
558 THg deposition. However, it should be noted that the Hg input by throughfall and output by runoff have relative  
559 greater uncertainties, so the Hg budget in the temperate forest is roughly estimated in the current study.

560 The THg retention at subtropical forests in south China were about 2.5 times these at temperate forests in north  
561 China. If we hypothesis the total input fluxes of Hg were 20.2 and 39.2  $\mu\text{g m}^{-2} \text{yr}^{-1}$  and output were 11.3  $\mu\text{g m}^{-2} \text{yr}^{-1}$   
562 (8.6 for soil emission flux, 2.7 for runoff flux) and 8.8  $\mu\text{g m}^{-2} \text{yr}^{-1}$  (soil emission flux: 6.7, outflow flux: 2.1) for  
563 North America and Europe, respectively, according to the average fluxes for each item, the calculated retention were  
564 8.9 and 30.4  $\mu\text{g m}^{-2} \text{yr}^{-1}$ , respectively. The THg retention at subtropical forests was higher compared to these in  
565 North America (3.8 to 7.9 folds) and Europe, and the retention in the temperate forest was lower compared to those  
566 in the Europe but higher compared to those in North America (1.2 to 2.8 folds).

567

## 568 **5. Hg storage and risk assessment**

### 569 **5.1. Hg storage in soils**

570 Highly elevated THg contents in forest top soils were mostly likely originated from atmospheric depositions via  
571 litterfall and throughfall, whereas very limited source was originated from geological sources (Obrist et al., 2011).  
572 Table S1 summarizes all studies of soil Hg concentrations and pools at forests of China from the literature. However,  
573 it is should be note that the attempts to compare soil Hg concentrations and pools with the data from each other and  
574 some other studies are facing difficulties, because these studies either reported the amounts of THg accumulated in

575 different horizons or calculated THg pools stored in soil profiles of different depths, which were inconsistent with  
576 each other.

577 Declining Hg concentrations with soil depth are generally observed in organic to mineral layers and did not vary  
578 in the lower mineral soils from all the soil profiles in Chinese forests. Highest THg concentrations observed in litter  
579 and upper soils are indicative of Hg sorption from atmospheric deposition to upper soil horizons. As organic soils are  
580 net traps of deposited atmospheric Hg and topsoil concentrations reflect recent Hg depositions from the atmosphere,  
581 we concluded THg concentrations from topsoil (most in the organic horizons) in the Fig. S3. The soil THg  
582 concentration at remote forests averaged  $150 \text{ ng g}^{-1}$  and the median concentration was  $104 \text{ ng g}^{-1}$ , ranging from 59  
583 to  $353 \text{ ng g}^{-1}$  ( $n = 18$ ). The concentrations were slight higher than those observed in remote areas of North America,  
584 which were generally less than  $150 \text{ ng g}^{-1}$  for surface soils (Larssen et al., 2008; Obrist et al., 2011). The THg  
585 concentrations at rural & suburban forests were much higher than these observed at remote forests, which ranged  
586 from 76 to  $332 \text{ ng g}^{-1}$  (mean:  $198 \text{ ng g}^{-1}$ ; median:  $196 \text{ ng g}^{-1}$ ). This is in a good agreement with the elevated  
587 atmospheric Hg concentrations and higher loading of Hg in at rural & suburban forests of China, which can be proved  
588 by the significant correlation between Hg retentions and soil THg concentrations ( $r^2=0.62$ ,  $p< 0.05$ ,  $n=7$ ). Predictably,  
589 higher THg depositions and soil THg concentrations has resulted higher THg pools in forest soils. For example, in  
590 the remote forests of Mt. Gongga and Mt. Ailao, the THg storage were up to  $152.3$  and  $191.3 \text{ mg m}^{-2}$  in the soil  
591 profiles of 90 and 80-cm depth, which were much higher than these in the upland forest of central Adirondack  
592 Mountain of USA and ( $64 \text{ mg m}^{-2}$  in 0–90 cm depth) (Selvendiran et al., 2008) and upland forest of Steinkreuz,  
593 Germany ( $19 \text{ mg m}^{-2}$  in 0–60 depth) (Schwesig and Matzner, 2000). However, THg storage in forest soils of  
594 temperate forests and Tibet Plateau with relative lower atmospheric Hg deposition (Zhou et al., 2017a; Gong et al.,  
595 2014), were comparable to that in North America and Europe.

596

## 597 5.2. Hg storage in biomass

598 Vegetation is known to exert significant influence the dynamics of Hg in the forest ecosystem including  
599 atmospheric Hg input and output in the terrestrial ecosystem (Ma et al., 2016; Zhou et al., 2016a). Two studies  
600 investigated the Hg distribution in the tissues of vegetation at the subtropical forest (Tieshanping forest, Zhou et al.,  
601 2016) and temperate forest (Mt. Dongling, Zhou et al., 2017a) and highest THg concentrations are observed in the O  
602 horizons compared to THg in the other biomass, because organic matter was enhanced during natural processes of  
603 litterfall decomposition and transformation, in which organic matter binding Hg compounds are usually more

604 stabilized via complexing, humification and adsorption to clay minerals (Demers et al., 2007; Zhou et al., 2017a).  
605 Sequentially, relative higher THg was observed in the litterfall and leaf due to canopy leaf can effectively capture Hg  
606 in atmosphere, which can uptake Hg by stomata (Fu et al., 2015).

607 Root is contacted with mineral soil directly, likely to higher concentration than that of aboveground wood (Grigal,  
608 2003). THg concentrations in roots of Norway spruce in southern Sweden were  $40 \text{ ng g}^{-1}$  (Munthe et al., 1998), which  
609 was much lower than that in the root of Masson pine in southwestern China ( $71 \text{ ng g}^{-1}$ , Zhou et al., 2016a) due to  
610 large THg loading in this area. Only Zhou et al. (2016) estimated the THg pools in roots that accounted for about 34%  
611 of the overstory THg pools. Bole wood had the largest biomass of vegetation in the forest, but lowest THg  
612 concentrations were observed. A previous study suggested that the source of the THg in wood was translocated from  
613 foliage (Barghigiani et al., 1991). Concentrations of Hg were positively correlated in 11 pairs of leaf and adjacent  
614 bole wood samples of different tree species at forests of China (Fig. S4). It is reasonable for their correlation because  
615 leaf and bole wood are both exposed, one directly and the other indirectly to the same atmospheric pool of Hg.  
616 However, no significant correlation was observed between THg concentrations in bark and bole wood or leaf,  
617 probably due to that the THg accumulation rates were differed in the barks of different tree species.

618 THg concentrations of each component at the suburban forest of Tieshanping at subtropical zone was much higher  
619 than those at the remote forest of Mt. Dongling at temperate zone. Accordingly, much higher THg pool of  $103.5 \text{ mg}$   
620  $\text{m}^{-2}$  showed in suburban forest of Tieshanping than that of  $7.3\text{--}10.8 \text{ mg m}^{-2}$  in remote forest of Mt. Dongling (Fig.  
621 S5). The THg pools in North America were much lower than those at subtropical forest of China and comparable to  
622 those at temperate forest of China (Friedli et al., 2007; Obrist et al., 2009; Richardson et al., 2013). Nonetheless, soil  
623 THg pools accounted for over 90% of the total ecosystem Hg pools forests around the world.

624

### 625 5.3. Risk assessment

626 The studies summarized in this review showed significant inputs and retention of Hg in forest ecosystems in  
627 China. The apparent accumulation and storage of THg may present an important ecological risk. Firstly, the Hg in  
628 forest soil could be re-emitted back to the atmosphere. Organic matter has a high binding ability of Hg in forest  
629 surface soils, but the Hg bonded organic carbon would probably be released to the environment as the decomposition  
630 of organic matter occurs. Studies on climate change showed that the accelerated global warming would accelerate  
631 the decomposition of organic carbon (Schimel et al., 1994), which could probably accelerate Hg emission from soil  
632 (Obrist, 2007; Fu et al., 2010a). Additionally, the increasing of global temperature would aggravate the occurrence

633 of potential fires and causing large pulses of Hg to the global atmospheric pool (Zhou et al., 2016a, 2017a).

634 Secondly, the Hg retention in the forest soils would accumulate through food webs, threatening the balance of  
635 forest ecosystems (Rimmer et al., 2010). However, the relevant studies in China were rare. Many studies showed that  
636 mushroom had high accumulation ability of THg and MeHg from substrate (like soil, litter and wood) and strong  
637 translocation to the fruiting bodies (Falandysz et al., 2015a, b, 2016). Studies in southwestern China showed that  
638 THg concentrations in the Fungi *Boletus* species and genus *Leccinum* species were up to 3500–4800 ng g<sup>-1</sup> (mean  
639 42000 ng g<sup>-1</sup>) and 4900–22000 ng g<sup>-1</sup> (10900 ng g<sup>-1</sup>) dry matter, respectively (Falandysz et al., 2015a, b). Similarly,  
640 a study in Poland also showed efficient accumulation of THg in the *Leccinum* mushrooms, but the average Hg  
641 concentrations being an order of magnitude lower because of lower concentrations of THg in surface forest soil of  
642 Poland. Although some lowly cumulative species of mushroom were observed in the subtropical forests (Kojta et al.,  
643 2015), mushroom is an important food item in southwestern China, and high rates of consumption can deliver  
644 relatively high doses of Hg to local human beings (Kojta et al., 2015; Falandysz et al., 2015a, b, 2016). The chronic  
645 dietary intake (CDI, μg kg<sup>-1</sup> bw day<sup>-1</sup>) of Hg depends on both the mushroom Hg concentrations (C) and the daily  
646 intake rates (IR), which are widely used to predict the exposure level of humans to trace elements (Du et al., 2016;  
647 Zhou et al., 2018). According to the Exposure Factors Handbook of the US Environmental Protection Agency, the  
648 CDI can be calculated as

$$649 \quad \text{CDI} = \sum (C \times \text{IR}) / \text{BW} \quad (1)$$

650 where *BW* (kg) is body weight. The IR was assumed as 43 g day<sup>-1</sup> and the bw was assumed as 60 kg for Chinese  
651 residents according to the previous studies in Yunnan province (Kojta et al., 2015).

652 According to the CDI of mushroom consumptions, a Hazard Quotient (*HQ*) indicating the non-carcinogenic  
653 health risk during a lifetime can be calculated by dividing the CDI by the toxicity threshold value of the reference  
654 dose (*RfD*).

$$655 \quad \text{HQ} = \text{CDI} / \text{RfD} \quad (2)$$

656 The recommended *RfD* of Hg by Joint Food and Agriculture Organization (FAO)/WHO Expert Committee on  
657 Food Additives is 0.57 μg kg<sup>-1</sup> bw day<sup>-1</sup> (JECFA 2010). When the *HQ* is ≤ 1, the adverse health effects are unlikely  
658 experienced, whereas the value > 1 indicates potential non-carcinogenic effects. Based on the averaged Hg  
659 concentrations in the mushrooms from five studies in subtropical forests of China, all the values of *HQ* showed > 1,  
660 demonstrating a much higher non-carcinogenic risk to consumers caused by daily intake of Hg through mushroom  
661 ingestions (Table S2). The result suggested the need for greater focus on the adverse health effects induced by Hg on



662 [the consumers in China.](#)

663 Additionally, the ecological stress to forest insect were investigated in an suburban forest (Tieshangping) in China,  
664 which showed that insect living in the soil has two to three orders of magnitude higher THg accumulation than that  
665 living on the plant due to large Hg pools in the forest soils (Zhou et al., 2016a). Although animals in the high position  
666 of the food chain were not studied in forest of China, Rimmer et al. (2010) showed that food web reflected the transfer  
667 of Hg from lower to higher trophic levels with a resulting increase in Hg burden. Therefore, we can infer that Hg will  
668 be seriously bioaccumulated along the food chain and pose risk to the local creatures by physiological toxicity.

669

## 670 **6. Environmental implication and research needs**

671 The large THg retention of in the forest ecosystem suggested strong adsorption and absorption of Hg by vegetation  
672 that was underestimated by global modeling of previous studies. If we roughly estimated the THg deposition at forests  
673 of China using the average THg depositions ( $92.45 \mu\text{g m}^{-2} \text{yr}^{-1}$ ) by present studies and the forest area ( $2.08 \times 10^{12} \text{m}^2$ )  
674 in 2015, the THg deposition would be  $192.3 \text{ t yr}^{-1}$  in forest areas of China. GEOS-Chem model estimates the mean  
675 dry deposition of  $12.3 \text{ mg m}^{-2} \text{yr}^{-1}$ , which converted to the total Hg deposition in China is  $<121.0 \text{ t yr}^{-1}$  (Wang et al.,  
676 2014). Given that more than 80% of the THg deposition was from dry deposition, the THg dry deposition was  $153.8$   
677  $\text{t yr}^{-1}$  in forest ecosystems of China, which is even higher than the total Hg deposition in the whole mainland China.  
678 Therefore, a large underestimation compared to the observation-based estimate just from forest areas of China in this  
679 study. Therefore, future model studies should consider the THg dry deposition in forested areas individually.

680 Hg sequestered in forest litters and surface soil by legacy Hg retention can be quickly volatilized to the  
681 atmosphere by soil-atmosphere exchanges. Recent global Hg models suggested that soils not only act as net sinks but  
682 also as net sources for atmospheric Hg in global Hg cycling (Amos et al., 2013), and the role of forest ecosystems as  
683 atmospheric Hg sink or a source are existing confliction (Lindberg et al., 1991, 1998; Pirrone et al., 2010). Using the  
684 global database of terrestrial surface-atmosphere fluxes, forest ecosystems appear a net deposition of  $59 \text{ t yr}^{-1}$ , but  
685 the estimation existed large uncertainties and ranged (37.5th–62.5th percentiles) from a deposition of  $727 \text{ t yr}^{-1}$  to an  
686 emission of  $703 \text{ t yr}^{-1}$  (Agnan et al., 2016). Base on the field observations of THg retention in Chinese forests, the  
687 THg retention in forest soils was  $69 \text{ t yr}^{-1}$  just in China, which was much higher than the global data of  $59 \text{ t yr}^{-1}$   
688 (Agnan et al., 2016). Such difference is mainly resulted from the variation of reported atmospheric Hg uptake by  
689 foliage and the limited geospatial representation of available data (Wang et al, 2016; Zhu et al., 2016; Agnan et al.,  
690 2016). Thus, more studies should be conducted to character the whole-ecosystem fluxes and to question to what

691 degree the ecosystems are net sinks or sources of atmospheric Hg.

692 To better assess the role of forest ecosystems in the global Hg cycling, it is also essential to understand the THg  
693 pools in the branches, stems and roots that can be translated from the atmosphere by the foliage uptake. A previous  
694 study estimated that approximately 139 t yr<sup>-1</sup> Hg was stored in bole woods (Obrist et al., 2007). However, there is no  
695 study exactly quantifying the amount of Hg translocation after Hg uptake by leaves, and the THg storage in biomass  
696 are scarce and need more data. Further studies concerning the transformation and migration processes after vegetation  
697 uptake will benefit to constrain atmospheric Hg sink in forest ecosystems.

698 In addition, the large “active” soil pool at forests is a potential short-term and long-term source of THg and MeHg  
699 to downstream aquatic ecosystems (Selvendiran et al., 2008; Ma et al., 2015). However, there is no study reporting  
700 the accumulation of THg and MeHg in aquatic ecosystem after output from the forest ecosystem. The processes of  
701 Hg methylation, transformation and translocation may be different from those in North America and Europe because  
702 of the larger Hg deposition and storage in China, which requires further investigation when more data become  
703 available.

704

## 705 **7. Conclusions**

706 As the largest energy consumer and anthropogenic Hg emission in the world, much attention has been paid to  
707 characterize the behavior of Hg in China. Forests are regarded as large pools of Hg in the global Hg cycle. In this  
708 paper, an integrated review of the knowledge reported in peer-reviewed literature is provided. Hg deposition and  
709 pools have been found to be substantially elevated in both remote, rural & suburban forests of China compared to  
710 those observed in North America and Europe. A strong spatial variation in Hg pools was observed, with high storage  
711 related to regional atmospheric Hg concentrations in southern China. The large Hg storage in the forests pose a  
712 serious threat for large pluses to the atmospheric Hg during accelerated organic matter decomposition and potential  
713 wildfires, and additional ecological stress to forest animals. However, very few studies are attempted to study the  
714 ecological risk of Hg in the forest ecosystem in China, which are suffering highly Hg depositions.

715 The forests play important roles in the geochemical cycles of Hg in China. According to the budget calculation,  
716 the THg retention ranged from 26.1 to 60.4 μg m<sup>-2</sup> yr<sup>-1</sup> at the subtropical forests in southern China, accounted for  
717 ranging from 46.6% to 62.8% of THg inputs, and ranged from 12.4 to 26.2 μg m<sup>-2</sup> yr<sup>-1</sup> at the temperate forests in  
718 northern China. The Hg retention and storage pools in at the subtropical forests were much higher than those in North  
719 America, but those in the temperate forests were comparable to Europe and North America. The result of the current

720 review may answer the question to what degree the ecosystems are net sinks or sources of atmospheric Hg in China.  
721 However, further studies are needed to accurately quantify Hg budgets and retentions of Hg in different forests  
722 ecosystems in China, as well as the atmospheric Hg budget in China.

723

## 724 **Acknowledgments**

725 This research was funded by the National Science and Technology Support Plan (2015BAD05B01), the National  
726 Basic Research Program of China (2013CB430002) and National Natural Science Foundation of China (41701361  
727 and 4157146). The anonymous reviewers are acknowledged for providing insightful comments and suggestions. The  
728 anonymous reviewers are acknowledged for providing insightful comments and suggestions.

729

730

## 731 **Reference:**

- 732 Agnan, Y., Le Dantec, T., Moore, C. W., Edwards, G. C., and Obrist, D.: New constraints on terrestrial surface–atmosphere fluxes of  
733 gaseous elemental mercury using a global database, *Environ. Sci. Technol.*, 50(2), 507–524, 2016.
- 734 Allard, B., and Arsenie, I.: Abiotic reduction of mercury by humic substances in aquatic system – an important process for the mercury  
735 cycle, *Water Air Soil Poll.*, 56, 457–464, 1991.
- 736 Almeida, M. D., Marins, R. V., Paraquetti, H. H. M., Bastos, W. R. and Lacerda, L.: D. Mercury degassing from forested and open field  
737 soils in Rondônia, Western Amazon, Brazil, *Chemosphere*, 77 (1), 60– 66, 2009.
- 738 Amos, H. M., Jacob, D. J., Streets, D. G., and Sunderland, E. M.: Legacy impacts of all-time anthropogenic emissions on the global  
739 mercury cycle, *Global Biogeochem. Cyc.*, 27(2), 410–421, 2013.
- 740 Barghigiani, C., Ristori, T., and Bauleo, R.: Pinus as an atmospheric Hg biomonitor, *Environ. Technol.*, 12, 1175–1181,  
741 doi:10.1080/09593339109385118, 1991.
- 742 Blackwell, B. D., and Driscoll, C. T.: Deposition of mercury in forests along a montane elevation gradient, *Environ. Sci. Technol.*, 49,  
743 5363–5370, 2015b.
- 744 Blackwell, B. D., and Driscoll, C. T.: Using foliar and forest floor mercury concentrations to assess spatial patterns of mercury deposition.  
745 *Environ. Pollut.*, 202, 126-134, 2015a.
- 746 Bushey, J. T., Nallana, A. G., Montesdeoca, M. R., and Driscoll, C. T.: Mercury dynamic of a northern hardwood canopy, *Atmos. Environ.*,  
747 42, 6905-6914, 2008.
- 748 Carpi, A., and Lindberg, S. E.: Application of a Teflon TM dynamic flux chamber for quantifying soil mercury flux: tests and results  
749 over background soil, *Atmos. Environ.*, 32 (5), 873–882, 1998.
- 750 Carpi, A.; Fostier, A. H.; Orta, O. R.; dos Santos, J. C.; and Gittings, M. Gaseous mercury emissions from soil following forest loss and  
751 land use changes: field experiments in the United States and Brazil, *Atmos. Environ.* 2014, 96, 423–429.
- 752 Chen, C., Wang, H. H., Zhang, W., Hu, D., Chen, L., and Wang, X. J.: High-resolution inventory of mercury emissions from biomass  
753 burning in China for 2000–2010 and a projection for 2020, *J. Geophys. Res.–Atmos.*, 118 (21), 12248–12256, 2013.
- 754 Choi, H. D., and Holsen, T. M.: Gaseous mercury emissions from unsterilized and sterilized soils: The effect of temperature and UV  
755 radiation, *Environ. Pollut.*, 157, 1673–1678, 2009.
- 756 Choi, H. -D., Sharac, T. J., and Holsen, T. M.: Mercury deposition in the Adirondacks: A comparison between precipitation and  
757 throughfall, *Atmos. Environ.*, 42, 1818–1827, 2008.

758 Demers, J. D., Driscoll, C. T., Fahey, T. J., and Yavitt, J. B.: Mercury cycling in litter and soil in different forest types in the Adirondack  
759 Region, New York, USA, *Ecol. Appl.*, 17, 1341–1351, 2007.

760 Du B.: Field measurement of soil mercury emission flux in forest. Master's dissertation, Tsinghua University, Beijing, China, 1–112,  
761 2014. (in Chinese).

762 Du, B., Li, P., Feng, X., Qiu, G., Zhou, J., and Maurice, L.: Mercury exposure in children of the Wanshan mercury mining area, Guizhou,  
763 China, *Inter. Int. J. Environ. Res. Public Health* 13, 1107, 2016.

764 Edwards, G. C., and Howard, D. A.: Air-surface exchange measurements of gaseous elemental mercury over naturally enriched and  
765 background terrestrial landscapes in Australia, *Atmos. Chem. Phys.*, 13, 5325–5336, doi:10.5194/acp-13-5325-2013, 2013.

766 Ericksen, J. A., Gustin, M. S., Xin M., Weisberg, P. J., and Fernandez, G. C. J.: Air–soil exchange of mercury from background soils in  
767 the United States, *Sci. Total Environ.*, 366, 851–863, 2006.

768 Falandysz, J., and Drewnowska, M.: Distribution of mercury in *amanita fulva* (schaeff.) *secr.* mushrooms: accumulation, loss in cooking  
769 and dietary intake, *Ecotox. Environ. Safe.*, 115, 49–54, 2015a.

770 Falandysz, J., Saba, M., Liu, H. G., Li, T., Wang, J. P., Wiejak, A., Zhang, J., Wang, Y. Z., and Zhang, D.: Mercury in forest mushrooms  
771 and topsoil from the Yunnan highlands and the subalpine region of the Minya Konka summit in the eastern Tibetan plateau, *Environ.*  
772 *Sci. Pollut. Res.*, 23(23), 1–12, 2016.

773 Falandysz, J., Zhang, J., Wang, Y., Krasińska, G., Kojta, A., Saba, M., Shen, T., Li, T., and Liu, H.: Evaluation of the mercury  
774 contamination in mushrooms of genus *leccinum* from two different regions of the world: accumulation, distribution and probable  
775 dietary intake, *Sci. Total Environ.*, 537, 470–478, 2015b.

776 Fay, L., and Gustin, M.: Assessing the influence of different atmospheric and soil mercury concentrations on foliar mercury  
777 concentrations in a controlled environment, *Water Air Soil Poll.*, 181, 373–384, 2007.

778 Fei, M. O., Xuyong, L. I., Shuxia, H. E., and Wang, X.: Evaluation of soil and water conservation capacity of different forest types in  
779 Dongling Mountain, *Acta Ecologica Sinica*, 31(17), 5009–5016, 2011. (in Chinese with English abstract)

780 Fisher, L. S., and Wolfe, M. H.: Examination of mercury inputs by throughfall and litterfall in the Great Smoky Mountains National  
781 Park, *Atmos. Environ.*, 47, 554–559, 2012.

782 Friedli, H. R., Radke, L. F., Payne, N. J., Mcrae, D. J., Lynham, T. J., and Blake, T. W.: Mercury in vegetation and organic soil at an  
783 upland boreal forest site in Prince Albert National Park, Saskatchewan, Canada, *J. Geophys. Res.*, 112, G01004.  
784 <http://dx.doi.org/10.1029/2005JG000061>, 2007.

785 Fu, X. W., Feng, X. B., Zhu, W. Z., Wang, S. F., and Lu, J. L.: Total gaseous mercury concentrations in ambient air in the eastern slope  
786 of Mt. Gongga, South-Eastern fringe of the Tibetan plateau, China, *Atmos. Environ.*, 42, 970–979,  
787 doi:10.1016/j.atmosenv.2007.10.018, 2008a.

788 Fu, X. W., Feng, X. B., Zhu, W. Z., Zheng, W., Wang, S. F., and Lu, J. Y.: Total particulate and reactive gaseous mercury in ambient air  
789 on the eastern slope of the Mt. Gongga area, China, *Appl. Geochem.*, 23, 408–418, doi:10.1016/j.apgeochem.2007.12.018, 2008b.

790 Fu, X. W., Feng, X., Dong, Z. Q., Yin, R. S., Wang, J. X., Yang, Z. R., and Zhang, H.: Atmospheric gaseous elemental mercury (GEM)  
791 concentrations and mercury depositions at a high-altitude mountain peak in south China, *Atmos. Chem. Phys.*, 10, 2425–2437,  
792 doi:10.5194/acp-10-2425-2010, 2010a.

793 Fu, X. W., Feng, X., Shang, L. H., Wang, S. F., and Zhang, H.: Two years of measurements of atmospheric total gaseous mercury (TGM)  
794 at a remote site in Mt. Changbai area, Northeastern China, *Atmos. Chem. Phys.*, 12, 4215–4226, doi:10.5194/acp-12-4215-2012, 2012.

795 Fu, X. W., Feng, X., Zhu, W., Rothenberg, S., Yao, H., and Zhang, H.: Elevated atmospheric deposition and dynamics of mercury in a  
796 remote upland forest of southwestern China, *Environ. Pollut.*, 158, 2324–2333, doi:10.1016/j.envpol.2010.01.032, 2010a.

797 Fu, X. W., Zhang, H., Yu, B., Wang, X., Lin, C. -J., and Feng, X. B., Observations of atmospheric mercury in China: a critical review,  
798 *Atmos. Chem. Phys.*, 15, 9455–9476, doi:10.5194/acp-15-9455-2015, 2015.

799 Fu, X., Feng, X., and Wang, S.: Exchange fluxes of hg between surfaces and atmosphere in the eastern flank of mount gongga, sichuan  
800 province, southwestern China, *Journal of Geophysical Research–Atmospheres*, 113(D20), 253–270, 2008c.

801 Fu, X., Xu, Y., Lang, X., Zhu, J., Zhang, H., Yu, B., Yan, H., Lin, C. -J., and Feng, X. B.: Atmospheric wet and litterfall mercury  
802 deposition in typical rural and urban areas in China, *Atmos. Chem. Phys.*, 16(18), 11547–11562, 2016.

803 Gong, P., Wang, X. -P., Xue, Y. -G., Xu, B. -Q., and Yao, T. -D.: Mercury distribution in the foliage and soil profiles of the Tibetan forest:  
804 Processes and implications for regional cycling, *Environ. Pollut.*, 188, 94–101, 2014.

805 Graydon, J. A., St. Louis, V. L., Hintelmann, H., Lindberg, S. E., Sandilands, K. A., Rudd, J. W. M., Kelly, C. A., Hall, B. D., and Mowat,  
806 L. D.: Long-term wet and dry deposition of total and methyl mercury in the remote boreal ecoregion of Canada, *Environ. Sci. Technol.*,  
807 42, 8345–8351, 2008.

808 Grigal, D.F., Kolk, R. K., Fleck, J. A., and Nater, E. A.: Mercury budget of an upland-peatland watershed, *Biogeochemistry*, 50, 95–109,  
809 2000.

810 Grigal, D.F.: Mercury sequestration in forests and peatlands: A review, *J. Environ. Qual.*, 32, 393–405, doi:10.2134/jeq2003.3930, 2003.

811 Gustin, M. S., Taylor, G. E., and Maxey, R. A.: Effect of temperature and air movement on the flux of elemental mercury from substrate  
812 to the atmosphere, *J. Geophys. Res.–Atmos.*, 102, 3891–3898, 1997.

813 Hanson, P. J., Lindberg, S. E., Tabberer, T. A., Owens, J. G., and Kim, K. H.: Foliar exchange of mercury-vapor-evidence for a  
814 compensation point, *Water Air Soil Poll.*, 80, 373–382, 1995.

815 Hartman, J. S., Weisberg, P. J., Pillai, R.; Ericksen, J. A., Kuiken, T., Lindberg, S. E., Zhang, H.; Rytuba, J. J., and Gustin, M. S.:  
816 Application of a rule-based model to estimate mercury exchange for three background biomes in the continental United States,  
817 *Environ. Sci. Technol.*, 43 (13), 4989–4994, 2009.

818 Horowitz, H. M., Jacob, D. J., Zhang, Y., Dibble, T. S., Slemr, F., Amos, H. M., Schmidt, J. A., Corbitt, E. S., Marais, E. A., and  
819 Sunderland, E. M.: A new mechanism for atmospheric mercury redox chemistry: implications for the global mercury budget, *Atmos.*  
820 *Chem. Phys.*, 17, 6353–6371, <https://doi.org/10.5194/acp-17-6353-2017>, 2017.

821 Hultberg, H., Munthe, J., and Iverfeldt, Å.: Cycling of methylmercury and mercury – Responses in the forest roof catchment to three  
822 years of decreased atmospheric deposition, *Water Air Soil Poll.*, 80, 415–424, 1995.

823 Iverfeldt, Å.: Mercury in forest canopy throughfall water and its relation to atmospheric deposition, *Water Air Soil Poll.*, 56, 553–564,  
824 1991.

825 JECFA, (Joint FAO/WHO Expert Committee on Food Additives). (2010). Joint FAO/WHO food standards programme, committee of  
826 the codex alimentarius commission, 33rd session. Geneva, Switzerland, July 5–9.

827 Johnson, K. B.: Fire and its effects on mercury and methylmercury dynamics for two watersheds in Acadia National Park, Maine, MSc.  
828 Thesis, the University of Maine, Maine, 73 pp., 2002.

829 Johnson, K. B., Haines, T. A., Kahl, J. S., Norton, S. A., Amirbahman, A., and Sheehan, K. D.: Controls on mercury and methylmercury  
830 deposition for two watersheds in Acadia National Park, Maine, *Environ. Monit. Assess.*, 126, 55–67, 2007.

831 Juillerat, J. I., Ross, D. S., and Bank, M. S.: Mercury in litterfall and upper soil horizons in forested ecosystems in Vermont, USA,  
832 *Environ. Toxicol. Chem.*, 31, 1720–1729, 2012.

833 Kalicin, M. H., Driscoll, C. T., Yavitt, J., Newton, R., and Munson, R.: The Dynamics of Mercury in Upland Forests of the Adirondack  
834 Region of New York, in: *Mercury in Adirondack wetlands, lakes and terrestrial systems (MAWLTS)*, New York State Energy Research  
835 and Development Authority, New York, 8-1-8-15, 2008.

836 Kojta, A. K., Zhang, J., Wang, Y., Li, T., Saba, M., and Falandysz, J.: Mercury contamination of fungi genus *xerocomus* in the Yunnan  
837 province in China and the region of Europe, *J. Environ. Sci. Heal. A*, 50(13), 1342–1350, 2015.

838 Kolka, R. K., Nater, E. A., Grigal, D. F., and Verry, E. S.: Atmospheric inputs of mercury and organic carbon into a forested  
839 upland/bogwatershed, *Water Air Soil Poll.*, 113, 273–294, 1999.

840 Kuiken, T., Gustin, M., Zhang, H., Lindberg, S. and Sedinger, B.: Mercury emission from terrestrial background surfaces in the eastern  
841 USA. II: Air/surface exchange of mercury within forests from South Carolina to New England, *Appl. Geochem.*, 23 (3), 356–368,  
842 2008a.

843 Kuiken, T., Zhang, H., Gustin, M., and Lindberg, S.: Mercury emission from terrestrial background surfaces in the eastern USA. Part I:  
844 Air/surface exchange of mercury within a southeastern deciduous forest (Tennessee) over one year, *Appl. Geochem.*, 23 (3), 345–355,  
845 2008b.

846 Kyllönen, K., Hakola, H., Hellen, H., Korhonen, M. and Verta, M.: Atmospheric mercury fluxes in a Southern boreal forest and wetland,  
847 *Water, Air, Soil Pollut.*, 223 (3), 1171–1182, 2012.

848 Lang, X., Mercury in atmospheric precipitation and litterfall in Mt. Ailao and Mt. Damei, Master's dissertation, Guizhou University,  
849 Guiyang, China, 1–78, 2014 (in Chinese).

850 Larssen, T., de Wit, H., Wiker, M., and Halse, K.: Mercury budget of a small forested boreal catchment in southeast Norway, *Sci. Total*  
851 *Environ.*, 404, 290–296, doi:10.1016/j.scitotenv.2008.03.013, 2008.

852 Lee, Y. H., Bishop, K. H., and Munthe, J.: Do concepts about catchment cycling of methylmercury and mercury in boreal catchments  
853 stand the test of time? Six years of atmospheric inputs and runoff export at Svartberget, northern Sweden, *Sci. Total Environ.*, 260,  
854 11–20, 2000.

855 Lin, C. J., Gustin, M. S., Singhasuk, P., Eckley, C., and Miller, M.: Empirical models for estimating mercury flux from soils, *Environ.*  
856 *Sci. Technol.*, 44, 8522–8528, 2010.

857 Lin, C.-J. and Pehkonen, S. O.: Aqueous free radical chemistry of mercury in the presence of iron oxides and ambient aerosol, *Atmos.*  
858 *Environ.*, 31, 4125–4137, 1997.

859 Lindberg, S. E. and Stratton, W. J., Atmospheric mercury speciation: Concentrations and behaviour of reactive gaseous mercury in  
860 ambient air, *Environ. Sci. Technol.*, 32, 49–57, 1998.

861 Lindberg, S. E., Brooks, S., Lin, C.-J., Scott, K. J., Landis, M. S., Stevens, R. K., Goodsite, M., and Richter, A.: Dynamic Oxidation of  
862 Gaseous Mercury in the Arctic Troposphere at Polar Sunrise, *Environ. Sci. Technol.*, 36, 1245-1256, 2002.

863 Lindberg, S. E., Owens, J. G., and Stratton, W. J., Application of throughfall methods to estimate dry deposition of mercury, in: *Mercury*  
864 *as a global pollutant*, Huckabee, J. and Watras, C. (Eds.), Lewis Publications, 261–272, 1994.

865 Lindberg, S. E., Turner, R. R., Meyers, T. P., Taylor, G. E., and Schroeder, W. H.: Atmospheric concentrations and deposition of Hg to a  
866 deciduous forest atwalker branch watershed, Tennessee, USA, *Water Air Soil Poll.*, 56(1), 577–594, 1991.

867 Lindberg, S. E.: In *Global and Regional Mercury Cycles: Sources, Fluxes and Mass Balances*; Baeyens, W., Ebinghaus, R., Vasiliev, O.,  
868 Eds.; NATO-ASI-Series, Vol. 21; Kluwer Academic Publishers: Dordrecht, The Netherlands, pp 359-380, 1996.

869 Liu, H.: Dynamics of soil properties and the effects factors among secondary successive communities in Mt. Jinyun, Doctor's dissertation,  
870 Southwest Agricultural University, 2005 (in Chinese with English abstract).

871 Luo Y.: Mercury input, output and transport in forest ecosystems in southern China, Doctor's dissertation, Tsinghua Universit, Beijing,  
872 China, 1–112, 2015a (in Chinese).

873 Luo, Y., Duan, L., Wang, L., Xu, G., Wang, S., and Hao, J.: Mercury concentrations in forest soils and stream waters in northeast and  
874 south China, *Sci. Total Environ.*, 496, 714–720, 2014.

875 Luo, Y., Duan, L., Xu, G., and Hao, J.: Inhibition of mercury release from forest soil by high atmospheric deposition of Ca<sup>2+</sup> and SO<sub>4</sub><sup>2-</sup>.  
876 *Chemosphere*, 134, 113-119, 2015b.

877 Ma, M., Wang, D., Du, H., Sun, T., Zhao, Z., Wang, Y., and Wei, S.: Mercury dynamics and mass balance in a subtropical forest,  
878 southwestern China, *Atmos. Chem. Phys.*, 16, 4529–4537, 2016

879 Ma, M., Wang, D., Sun, R., Shen, Y., and Huang, L.: Gaseous mercury emissions from subtropical forested and open field soils in a  
880 national nature reserve, southwest China, *Atmos. Environ.*, 64, 116–123, 2013.

881 Ma, M., Wang, D., Sun, T., Zhao, Z., and Du, H.: Forest runoff increase mercury output from subtropical forest catchments: an example  
882 from an alpine reservoir in a national nature reserve (southwestern China), *Environ. Sci. Pollut. Res.*, 22(4), 2745–2756, 2015.

883 Ma, M.: Mercury inputs, outputs, and sources under the forest canopy in typical subtropical forest ecosystem of southwest China, PhD  
884 Dissertation, Southwest University, Chongqing, China, 1–116, 2015 (in Chinese).

885 Magarelli, G., and Fostier, A. H.: Quantification of atmosphere - soil mercury fluxes by using a dynamic flux chamber: application at  
886 the Negro river basin, amazon, *Química Nova*, 28(6), 968-974, 2005.

887 Munthe, J. Hultberg, H., and Iverfeldt, A.: Mechanisms of deposition of methylmercury and mercury to coniferous forests, *Water Air*  
888 *Soil Poll.*, 80, 363–371, 1995.

889 Munthe, J., Pleijel, K., Iverfeldt, A., Kruger, O., and Petersen, G.: Atmospheric deposition of mercury in the Nordic countries at, different  
890 scenarios of reduced anthropogenic emissions in Europe, IVL Rapport B, 1998.

891 Nelson, S. J., Johnson, K. B., Kahl, J. S., Haines, T. A., and Fernandez, I. J.: Mass balances of mercury and nitrogen in burned and  
892 unburned forested watersheds at Acadia National Park, Maine, USA, *Environ. Monit. Assess.*, 126, 69–80, 2007.

893 Niu, Z., Zhang, X., Wang, Z., and Ci, Z.: Mercury in leaf litter in typical suburban and urban broadleaf forests in China, *J. Environ. Sci.*,  
894 23(12), 2042–2048, 2011.

895 Obrist, D., Johnson, D. W., and Lindberg, S. E.: Mercury concentrations and pools in four Sierra Nevada forest sites, and relationships  
896 to organic carbon and nitrogen, *Biogeosciences* 6, 765–777, 2009.

897 Obrist, D., Johnson, D. W., Lindberg, S. E., Luo, Y., Hararuk, O., Bracho, R., Battles, J. J., Dail, D. B., Edmonds, R. L., Monson, R. K.,  
898 Ollinger, S. V., Pallardy, S. G., Pregitzer, K. S., and Todd, D. E.: Mercury distribution across 14 U.S. forests. Part I: spatial patterns  
899 of concentrations in biomass, litter, and soils, *Environ. Sci. Technol.*, 45, 3974–3981, 2011.

900 Obrist, D., Pokharel, A. K., and Moore, C.: Vertical profile measurements of soil air suggest immobilization of gaseous elemental  
901 mercury in mineral soil, *Environ. Sci. Technol.*, 48 (4), 2242–2252. 2014.

902 Obrist, D.: Atmospheric mercury pollution due to losses of terrestrial carbon pools? *Biogeochemistry* 85, 119–123, 2007.

903 Obrist, D.: Mercury distribution across 14 U.S. Forests. Part II: Patterns of methyl mercury concentrations and areal mass of total and  
904 methyl mercury, *Environ. Sci. Technol.*, 46, 5921–5930, 2012.

905 Pannu, R., Siciliano, S. D., and O’Driscoll, N. J.: Quantifying the effects of soil temperature, moisture and sterilization on elemental  
906 mercury formation in boreal soils, *Environ. Pollut.*, 193, 138–146, 2014.

907 Pirrone, N., Cinnirella, S., Feng, X., Finkelman, R. B., Friedli, H. R., Leaner, J., Mason, R., Mukherjee, A. B., Stracher, G. B., Streets,  
908 D. G., and Telmer, K.: Global mercury emissions to the atmosphere from anthropogenic and natural sources, *Atmos. Chem. Phys.*, 10  
909 (13), 5951–5964, 2010.

910 Poissant, L., and Casimir, A.: Water-air and soil-air exchange rate of total gaseous mercury measured at background sites, *Atmos.*  
911 *Environ.*, 32 (5), 883–893, 1998.

912 Poissant, L., Pilote, M., Constant, P., Beauvais, C., Zhang, H. H., and Xu, X.: Mercury gas exchanges over selected bare soil and flooded  
913 sites in the bay St. François wetlands (Québec, Canada), *Atmos. Environ.*, 38(25), 4205–4214, 2004.

914 Poulain, A. J., Lalonde, J. D., Amyot, M., Shead, J. A., Raofie, F., and Ariya, P. A.: Redox transformations of mercury in an Arctic  
915 snowpack at springtime, *Atmos. Environ.*, 38, 6763–6774, 2004.

916 Poulain, A. J., Roy, V., and Amyot, M.: Influence of temperate mixed and deciduous tree covers on Hg concentrations and photoredox  
917 transformations in snow, *Geochim. Cosmochim. Acta*, 71 (10), 2448–2462, 2007.

918 Rea, A. W., Keeler, G. J., and Scherbatskoy, T.: The deposition of mercury in throughfall and litterfall in the Lake Champlain watershed:  
919 A short-term study, *Atmos. Environ.*, 30 (19), 3257–3263, 1996.

920 Rea, A. W., Lindberg, S. E., and Keeler, G. J.: Assessment of dry deposition and foliar leaching of mercury and selected trace elements  
921 based on washed foliar and surrogate surfaces, *Environ. Sci. Technol.*, 34, 2418–2425, 2000.

922 Rea, A. W., Lindberg, S. E., and Keeler, G. J.: Dry deposition and foliar leaching of mercury and selected trace elements in deciduous  
923 forest throughfall, *Atmos. Environ.*, 35, 3453–3462, doi:10.1016/S1352-2310(01)00133-9, 2001.

924 Richardson, J. B. and Friedland, A. J.: Mercury in coniferous and deciduous upland forests in northern New England, USA: implications  
925 of climate change, *Biogeosciences*, 12, 6737–6749, doi:10.5194/bg-12-6737-2015, 2015.

926 Richardson, J. B., Friedland, A. J., Engerbretson, T. R., Kaste, J. M., and Jackson, B. P.: Spatial and vertical distribution of mercury in  
927 upland forest soils across the northeastern United States, *Environ. Pollut.*, 182 (6), 127–134, 2013.

928 Rimmer, C. C., Miller, E. K., Mcfarland, K. P., Faccio, S. D., Strong, A. B., Taylor, R. J., and Faccio, S. D.: Mercury bioaccumulation  
929 in a terrestrial food web of a montane forest, *Ecotoxicology* 19, 697–709. <http://dx.doi.org/10.1007/s10646-009-0443-x>, 2010.

930 Risch, M. R., DeWild, J. F., Krabbenoft, D. P., Kolka, R. K., and Zhang, L.: Litterfall mercury dry deposition in the eastern USA, *Environ.*  
931 *Pollut.*, 161, 284–290, 2012.

932 Schimel, D. S., Braswell, B. H., Holland, E. A., McKeown, R., Ojima, D. S., Painter, T. H., Parton, W. J., and Townsend, A. R.: Climatic,  
933 edaphic and biotic controls over storage and turnover of carbon in soils, *Global Biogeochem. Cy.*, 8, 279–293, 1994.

934 Schroeder, W. H., Munthe, J., and Lindqvist, O.: Cycling of mercury between water, air, and soil compartments of the environment,  
935 *Water, Air, Soil Pollut.*, 48 (3–4), 337–347, 1989.

936 Schwesig, D. and Matzner, E.: Dynamics of mercury and methylmercury in forest floor and runoff of a forested watershed in Central  
937 Europe, *Biogeochemistry*, 53, 181–200, 2001.

938 Schwesig, D. and Matzner, E.: Pools and fluxes of mercury and methylmercury in two forested catchments in Germany, *Sci. Total*  
939 *Environ.*, 260, 213–223, 2000.

940 Seigneur, C., Vijayaraghavan, K., Lohman, K., Karamchandani, P., and Scott, C.: Global source attribution for mercury deposition in the  
941 United States, *Environ. Sci. Technol.*, 38, 555–569, 2004.

942 Selvendiran, P., Driscoll, C. T., Montesdeoca, M. R., and Bushey, J. T.: Inputs, storage, and transport of total and methyl mercury in two  
943 temperate forest wetlands, *J. Geophys. Res.*, 113, G00C01. <http://dx.doi.org/10.1029/2008JG000739>, 2008.

944 Sheehan, K. D., Fernandez, I. J., Kahl, J. S., and Amirbahman, A.: Litterfall mercury in two forested watersheds at Acadia National Park,  
945 Maine, USA, *Water Air Soil Poll.*, 170, 249–265, 2006.

946 St. Louis, V. L., Rudd, J. W. M., Kelly, C. A., Hall, B. D., Rolfhus, K. R., Scott, K. J., Lindberg, S. E., and Dong, W.: Importance of the  
947 forest canopy to fluxes of methylmercury and total mercury to boreal ecosystems, *Environ. Sci. Technol.*, 35, 3089–3098, 2001.

948 Wan, Q., Feng, X. B., Lu, J. L., Zheng, W., Song, X. J., Han, S. J., and Xu, H.: Atmospheric mercury in Changbai Mountain area,  
949 northeastern China I. The seasonal distribution pattern of total gaseous mercury and its potential sources, *Environ. Res.*, 109, 201–  
950 206, DOI 10.1016/j.envres.2008.12.001, 2009b.

951 Wan, Q., Feng, X. B., Lu, J., Zheng, W., Song, X. J., Li, P., Han, S. J., and Xu, H.: Atmospheric mercury in Changbai Mountain area,  
952 northeastern China II. The distribution of reactive gaseous mercury and particulate mercury and mercury deposition fluxes, *Environ.*  
953 *Res.*, 109, 721–727, doi:10.1016/j.envres.2009.05.006, 2009a.

954 Wang, D. Y., He, L., Shi, X. J., Wei, S. Q., and Feng, X. B.: Release flux of mercury from different environmental surfaces in Chongqing,  
955 China, *Chemosphere*, 64, 1845–1854, doi:10.1016/j.chemosphere.2006.01.054, 2006.

956 Wang, L., Wang, S. X., Zhang, L., Wang, Y. X., Zhang, Y. X., Nielsen, C., McElroy, M. B., and Hao, J. M.: Source apportionment of  
957 atmospheric mercury pollution in China using the GEOS-Chem model, *Environ. Pollut.*, 190, 166–175,  
958 doi:10.1016/j.envpol.2014.03.011, 2014.

959 Wang, S., Xing, D., Wei, Z., and Jia, Y.: Spatial and seasonal variations in soil and river water mercury in a boreal forest, Changbai  
960 Mountain, Northeastern China, *Geoderma*, 206(206), 123–132, 2013.

961 Wang, X., Bao, Z., Lin, C. J., Yuan, W., and Feng, X.: Assessment of global mercury deposition through litterfall. *Environ. Sci. Technol.*,  
962 50(16), 8548–8557, 2016a.

963 Wang, X., Yuan, W., and Feng, X.: Global review of mercury biogeochemical processes in forest ecosystems. *Prog. Chem.*, 29(9): 970–  
964 980, doi:10.7536/PC170343, 2017.

965 Wang, X., Lin, C., Lu, Z., Zhang, H., Zhang, Y., and Feng, X.: Enhanced accumulation and storage of mercury on subtropical evergreen  
966 forest floor: implications on mercury budget in global forest ecosystems, *J. Geophys. Res. Biogeo.*, 121, 2016b.

967 Wang, Y. M., Peng, Y. L., Wang, D. Y., and Zhang, C.: Wet deposition fluxes of total mercury and methylmercury in core urban areas,  
968 Chongqing, China, *Atmos. Environ.*, 92, 87–96, doi:10.1016/j.atmosenv.2014.03.059, 2014.

969 Wang, Y.: Study on eco-hydrological process to Land use/forest cover change of small typical watersheds in Beijing mountain area,  
970 Doctor's dissertation, Beijing Forestry University, 2012 (in Chinese with English abstract).

971 Wang, Z. W., Zhang, X. S., Xiao, J. S., Zhijia, C., and Yu, P. Z.: Mercury fluxes and pools in three subtropical forested catchments,  
972 southwest China, *Environ. Pollut.*, 157, 801–808, doi:10.1016/j.envpol.2008.11.018, 2009.



973 Wright, L. P., Zhang, L., and Marsik, F. J.: Overview of mercury dry deposition, litterfall, and throughfall studies, *Atmos. Chem. Phys.*,  
974 16(21), 1–46, 2016.

975 Xiao, Z. F., Munthe, J., W. H. S., and Lindqvist, O.: Vertical fluxes of volatile mercury over forest soil and lake surfaces in Sweden,  
976 *Tellus B*, 43(3), 267–279, 1991.

977 Xiao, Z., Sommar, J., Lindqvist, O., and Giouleka, E.: Atmospheric mercury deposition to grass in southern Sweden, *Sci. Total Environ.*,  
978 213(213), 85-94, 1998.

979 Xin, M. and Gustin, M. S.: Gaseous elemental mercury exchange with low mercury containing soils: Investigation of controlling factors,  
980 *Appl. Geochem.*, 22, 1451–1466, 2007.

981 Xue, T., Wang, R. Q., Zhang, M. M., and Dai, J. L.: Adsorption and desorption of mercury (II) in three forest soils in Shandong province,  
982 China, *Pedosphere*, 23(2), 265–272, 2013.

983 Yang, Y. K., Chen, H., and Wang, D. Y.: Spatial and temporal distribution of gaseous elemental mercury in Chongqing, China. *Environ.*  
984 *Monit. Assess.* 156, 479-489, 2009.

985 Yin, Y., And, H. E. A., Huang, C. P., Sparks, D. L., and Sanders, P. F.: Kinetics of mercury (ii) adsorption and desorption on soil, *Environ.*  
986 *Sci. Technol.*, 31(2), 496–503, 1997.

987 Zhang, H. and Lindberg, S. E.: Sunlight and iron (III)-induced photochemical production of dissolved gaseous mercury in freshwater,  
988 *Environ. Sci. Technol.*, 35, 928–935, 2001.

989 Zhang, H., Fu, X., Lin, C. J., Shang, L., Zhang, Y., Feng, X., and Lin, C.: Monsoon-facilitated characteristics and transport of atmospheric  
990 mercury at a high-altitude background site in southwestern China, *Atmos. Chem. Phys.*, 16(20), 1-36, 2016.

991 Zhang, H., Lindberg, S. E., Barnett, M. O., Vette, A. F., and Gustin, M. S.: Dynamic flux chamber measurement of gaseous mercury  
992 emission fluxes over soils. Part 1: simulation of gaseous mercury emissions from soils using a two-resistance exchange interface  
993 model, *Atmos. Environ.*, 36, 835–846, 2002.

994 Zhang, H., Lindberg, S. E., Marsik, F. J., and Keeler, G. J.: Mercury air/surface exchange kinetics of background soils of the  
995 Tahquamenon River watershed in the Michigan Upper Peninsula, *Water, Air, Soil Pollut.*, 126 (1–2), 151–169, 2001.

996 Zhou, J., Feng, X., Liu, H., Zhang, H., Fu, X., Bao, Z., Wang, X., and Zhang, Y.: Examination of total mercury inputs by precipitation  
997 and litterfall in a remote upland forest of southwestern China, *Atmos. Environ.*, 81, 364–372, doi:10.1016/j.atmosenv.2013.09.010,  
998 2013a.

999 Zhou, J., Lang, X., Du, B., Zhang, H., Liu, H., Zhang, Y., and Shang L.: Litterfall and nutrient return in moist evergreen broad-leaved  
1000 primary forest and mixed subtropical secondary deciduous broad-leaved forest in China, *Eur. J. Forest Res.*, 135(1), 77–86, 2016b.

1001 Zhou, J., Liang, J., Hu, Y., Zhang, W., Liu, H., You, L., Zhang, W., Gao, M., Zhou, J.: Exposure risk of local residents to copper near the  
1002 largest flash copper smelter in china. *Sci. Total Environ.*, 630, 453-461, 2018.

1003 Zhou, J., Liu, H., Du, B., Shang, L., Yang, J., and Wang, Y.: Influence of soil mercury concentration and fraction on bioaccumulation  
1004 process of inorganic mercury and methylmercury in rice (*Oryza sativa* L.), *Environ. Sci. Pollut. Res.*, 22, 6144–6154,  
1005 doi:10.1007/s11356-014-3823-6, 2015b.

1006 Zhou, J., Wang, Z., Sun, T., Zhang, H., and Zhang, X.: Mercury in terrestrial forested systems with highly elevated mercury deposition  
1007 in southwestern China: The risk to insects and potential release from wildfires, *Environ. Pollut.*, 212, 188–196,  
1008 doi:10.1016/j.envpol.2016.01.003, 2016a.

1009 Zhou, J., Wang, Z., Zhang, X., and Chen, J.: Distribution and elevated soil pools of mercury in an acidic subtropical forest of southwestern  
1010 China, *Environ. Pollut.*, 202, 187–195, doi:10.1016/j.envpol.2015.03.021, 2015a.

1011 Zhou, J., Wang, Z., Zhang, X., and Gao, Y.: Mercury concentrations and pools in four adjacent coniferous and deciduous upland forests  
1012 in Beijing, China, *J. Geophys. Res.–Biogeo.*, 2017a.

1013 Zhou, J., Wang, Z., Zhang, X., and Sun, T.: Investigation of factors affecting mercury emission from subtropical forest soil: a field  
1014 controlled study in southwestern China, *J. Geochem. Explor.*, 176, 128–135, 2017b.

1015 Zhou, J.: Atmospheric mercury deposition disciplines and its influencing factors in background area of Mt. Ailao in Yunnan, Master’s  
1016 dissertation, Guizhou University, 2013b (in Chinese with English abstract).

- 1017 Zhou, J.: Soil–atmosphere mercury fluxes and mercury pools in typical forest of China, Doctor’s dissertation, University of Chinese  
1018 Academy of Sciences, 2016c (in Chinese with English abstract).
- 1019 Zhu, W., Lin, C. J., Wang, X., Sommar, J., Fu, X., and Feng, X.: Global observations and modeling of atmosphere-surface exchange of  
1020 elemental mercury: a critical review, *Atmos. Chem. Phys.*, 16(7), 4451–4480, 2016.
- 1021

1022 **Table 1.** Hg concentrations (ng L<sup>-1</sup> or ng g<sup>-1</sup>) and deposition fluxes (μg m<sup>-2</sup> yr<sup>-1</sup>) in precipitation, throughfall, and  
 1023 litterfall in China.

| Site                   | Forest type                                                                                                                     | Altitude (m a.s.l.) | Location Type | Study period                       | Samples                                     | Concentration                |                     | Deposition flux              |                      | References            |
|------------------------|---------------------------------------------------------------------------------------------------------------------------------|---------------------|---------------|------------------------------------|---------------------------------------------|------------------------------|---------------------|------------------------------|----------------------|-----------------------|
|                        |                                                                                                                                 |                     |               |                                    |                                             | THg                          | MeHg                | THg                          | MeHg                 |                       |
| Mt. Yunnan             | Ailao, Subtropical evergreen broadleaf mixed                                                                                    | 2500                | Remote        | 06/2011–05/2012                    | Precipitation<br>Litterfall                 | 3.0<br>54.0                  | 0.08<br>0.28        | 5.4<br>71.2                  | 0.14<br>0.36         | Zhou et al., 2013a, b |
| Mt. Yunnan             | Ailao, Subtropical evergreen broadleaf mixed                                                                                    | 2500                | Remote        | 2011–2014                          | Precipitation<br>Litterfall<br>Throughfall  | 4.9<br>43–66<br>22.9         |                     | 4.9<br>75.0<br>20–30         |                      | Wang et al., 2016     |
| Mt. Guizhou            | Leigong, Subtropical deciduous broadleaf mixed                                                                                  | 2178                | Remote        | 05/2008–05/2009                    | Precipitation<br>Throughfall<br>Litterfall  | 4.0<br>8.9<br>91.0           | 0.04<br>0.1<br>0.48 | 6.1<br>10.5<br>39.5          | 0.06<br>0.12<br>0.28 | Fu et al., 2010a      |
| Mt. Guizhou            | Leigong, Subtropical deciduous broadleaf mixed                                                                                  | 1680                | Remote        | 03/2005–02/2006                    | Precipitation<br>Throughfall<br>Litterfall  | 12.9<br>36.7<br>135.1        |                     | 16.8<br>41.2<br>78.3         |                      | Wang et al., 2009     |
| Mt. Zhejiang           | Damei, Subtropical deciduous broadleaf mixed                                                                                    | 550                 | Remote        | 08/2012–08/2014<br>08/2012–07/2013 | Precipitation<br>Litterfall                 | 3.7<br>42.3                  |                     | 6.0<br>23.1                  |                      | Fu et al., 2016       |
| Mt. Sichuan            | Gongga, Subtropical evergreen broadleaf                                                                                         | 1640                | Remote        | 01–12/2006                         | Precipitation*                              | 9.9                          |                     | 9.1                          |                      | Fu et al., 2008b      |
| Mt. Sichuan            | Gongga, Subtropical evergreen broadleaf                                                                                         | 3000                | Remote        | 05/2005–04/2006                    | Precipitation*<br>Throughfall<br>Litterfall | 14.2<br>40.2<br>35.7         | 0.16<br>0.3         | 26.1<br>57.1<br>35.5         | 0.30<br>0.43         | Fu et al., 2010b      |
| Mt. Jilin              | Changbai, Temperate broadleaf and pine mixed                                                                                    | 750                 | Remote        | 08/2005–07/2006                    | Precipitation*<br>Throughfall               | 13.4<br>9.0                  |                     | 8.4<br>24.9                  |                      | Wan et al., 2009a     |
| Mt. Jilin              | Changbai, Temperate broadleaf and pine mixed                                                                                    | 736                 | Remote        | 08/2011–08/2014                    | Precipitation<br>Litterfall                 | 7.4<br>47                    |                     | 5.6<br>22.8                  |                      | Fu et al., 2016       |
| Mt. Beijing            | Dongling, Temperate Chinese pine evergreen<br>Temperate larch deciduous<br>Temperate oak deciduous<br>Temperate mixed deciduous | 1100                | Remote        | 09–11/2015                         | Litterfall<br>Litterfall<br>Litterfall      | 39.8<br>63.3<br>46.5<br>45.3 |                     | 15.8<br>19.6<br>14.1<br>12.9 |                      | Zhou et al., 2017a    |
| Linzhi, Tibet          | Subtropical evergreen coniferous                                                                                                | 3200                | Remote        | 8/2008                             | Litterfall                                  | 12.6                         |                     | 4.2                          |                      | Gong et al., 2014     |
| China sites)           | (22 Suburban evergreen broadleaf<br>Suburban deciduous broadleaf                                                                |                     | Suburban      |                                    | Litterfall<br>Litterfall                    | 50.8<br>25.8                 |                     | 17.9<br>8.73                 |                      | Niu et al., 2011      |
| Tieshanping, Chongqing | Subtropical evergreen coniferous                                                                                                | 500                 | Suburban      | 03/2005–03/2006                    | Precipitation<br>Throughfall<br>Litterfall  | 32.3<br>69.7<br>105          |                     | 29.0<br>71.3<br>220          |                      | Wang et al., 2009     |
| Tieshanping, Chongqing | Subtropical evergreen coniferous                                                                                                | 500                 | Suburban      | 2010–2011                          | Throughfall<br>Litterfall                   | 69<br>115                    |                     | 67.5<br>22.3                 |                      | Luo et al., 2015a     |
| Tieshanping,           | Subtropical evergreen coniferous                                                                                                | 500                 | Suburban      | 04/2014–                           | Litterfall                                  | 85                           | 0.21                | 40.51                        | 0.10                 | Zhou et al.,          |

|                       |                                       |      |       |                     |                                            |                        |                      |                         |                      |                      |
|-----------------------|---------------------------------------|------|-------|---------------------|--------------------------------------------|------------------------|----------------------|-------------------------|----------------------|----------------------|
| Chongqing             | Subtropical evergreen broadleaf       |      |       | 03/2015             | Litterfall                                 | 89                     | 0.23                 | 90.85                   | 0.34                 | 2016c                |
| Mt. Jinyun, Chongqing | Subtropical evergreen broadleaf       | 900  | Rural | 03/2012–<br>02/2013 | Precipitation<br>Throughfall<br>Litterfall | 11.9<br>20.1<br>104.5  | 0.20<br>0.55<br>0.84 | 15.9<br>21.8<br>43.5    | 0.26<br>0.60<br>0.27 | Ma et al.,<br>2015   |
| Mt. Simian, Chongqing | Subtropical evergreen broad-leaf      | 1394 | Rural | 03/2012–<br>02/2013 | Precipitation<br>Throughfall<br>Litterfall | 10.9<br>24.04<br>106.7 | 0.24<br>0.33<br>0.79 | 15.45<br>32.17<br>42.89 | 0.36<br>0.45<br>0.32 | Ma et al.,<br>2016   |
| Qianyanzhou, Jiangxi  | Subtropical evergreen coniferous      | 60   | Rural | 11/2013–<br>12/2014 | Precipitation<br>Throughfall<br>Litterfall | 23<br>42<br>42.9       |                      | 14.4<br>34.6<br>21.4    |                      | Luo et al.,<br>2015a |
| Huitong, Hunan        | Subtropical evergreen coniferous      | 335  | Rural | 4/2013–<br>12/2014  | Precipitation<br>Throughfall<br>Litterfall | 12.5<br>29.9<br>176.1  |                      | 15.9<br>27.8<br>33.6    |                      | Luo et al.,<br>2015a |
| Luchonguan, Guizhou   | subtropical broad-leaf and coniferous | 1360 | Urban | 01/2005–<br>01/2006 | Throughfall                                | 43.6                   |                      | 49.0                    |                      | Wang et al.,<br>2009 |

1024

1025

**Table 2.** Hg concentrations (ng L<sup>-1</sup> or ng g<sup>-1</sup>) and export fluxes (µg m<sup>-2</sup> yr<sup>-1</sup>) in stream water/runoff in China.

| Site                   | Forest type                                            | Altitude<br>(m a.s.l) | Location<br>Type | Study<br>period  | THg<br>concentration | THg<br>export<br>flux | References         |
|------------------------|--------------------------------------------------------|-----------------------|------------------|------------------|----------------------|-----------------------|--------------------|
| Northeast China        | Temperate evergreen/deciduous coniferous and broadleaf | 442 ± 324             | Remote and rural |                  | 17.2±11.0            |                       | Luo et al., 2014   |
| South China            | Subtropical evergreen conifers/mixed broad-leaved      | 548 ± 295             | Remote and rural |                  | 6.2 ±6.4             |                       | Luo et al., 2014   |
| Mt. Leigong, Guizhou   | Subtropical deciduous broadleaf mixed forest           | 1680                  | Remote           | 03/2005–02/2006  | 4.3±2.5              | 3.0                   | Wang et al., 2009  |
| Mt. Changbai, Jilin    | Temperate broadleaf and pine mixed                     | 750                   | Remote           | 04/2009, 09/2009 | 5.5 ± 4.1            |                       | Wang et al., 2013  |
| Tieshanping, Chongqing | Subtropical evergreen coniferous                       | 500                   | Suburban         | 03/2005–03/2006  | 6.2 ±3.5             | 3.5                   | Wang et al., 2009  |
| Tieshanping, Chongqing | Subtropical evergreen coniferous                       | 500                   | Suburban         | 04/2014          | 3.1 ± 1.2            |                       | Zhou et al., 2015a |
| Luchongguan, Guizhou   | Subtropical broad leaf-coniferous mixed subtropical    | 1360                  | Urban            | 01/2005–01/2006  | 8.9± 6.7             | 4.5                   | Wang et al., 2009  |
| Mt. Gongga, Sichuan    | Subtropical evergreen broadleaf                        | 3000                  | Remote           | 05/2005–04/2006  | 3.5±0.9              | 8.6                   | Fu et al., 2010a   |
| Mt. Simian, Chongqing  | Subtropical evergreen broad-leaf                       | 1394                  | Rural            | 03/2012–02/2013  | 3.9 ± 2.0            | 7.23                  | Ma et al., 2016    |
| Huitong, Hunan         | Subtropical evergreen coniferous                       | 335                   | Rural            | 4/2013–12/2014   | 4.9                  | 2.03                  | Luo et al., 2015a  |
| Qianyanzhou, Jiangxi   | Subtropical evergreen coniferous                       | 60                    | Rural            | 11/2013–12/2014  | 2.3                  |                       | Luo et al., 2015a  |

1029  
1030

**Table 3.** Soil-atmosphere Hg exchange fluxes ( $\text{ng m}^{-2} \text{hr}^{-1}$ ), soil Hg concentrations and surface TGM concentrations ( $\text{ng m}^{-3}$ ) in atmosphere in forested areas of China and other regions.

| Locations                            | Forest Type             | Altitude | Location Type | Study period       | Soil Hg | Surface TGM | Flux       | References        |
|--------------------------------------|-------------------------|----------|---------------|--------------------|---------|-------------|------------|-------------------|
| Mt. Dongling, Beijing (Temperate)    | Chinese Pine            | 1050     | Remote        | 07/2015–05/2016    | 88      | 2.2±1       | 0.01±2.6   | Zhou et al. 2016c |
|                                      | Larch                   | 1020     | Remote        | 07/2015–05/2016    | 69      | 2.3±1       | 0.12±1.28  | Zhou et al. 2016c |
|                                      | Mixed broadleaf forest  | 1250     | Remote        | 07/2015–05/2016    | 54      | 2.4±1       | 0.46±1.36  | Zhou et al. 2016c |
|                                      | Wetland                 | 1150     | Remote        | 07/2015–05/2016    | 154     | 2.5±1.1     | 3.6±6.8    | Zhou et al. 2016c |
| Mount Gongga, Sichuan (Subtropical)  | Shrub                   | 2350     | Remote        | 21–22/08/2006      | 90      | 3.6±1.3     | 6.6±4.2    | Fu et al., 2008   |
|                                      | Broadleaf Forest        | 1220     | Remote        | 27–29/08/2006      | 60      | 3.7±0.5     | 5.7±4.7    | Fu et al., 2008   |
|                                      | Broadleaf Forest        | 1650     | Remote        | 17–18/08/2006      | 110     | 2.3±0.4     | 9.3±4.3    | Fu et al., 2008   |
|                                      | Broadleaf Forest        | 2140     | Remote        | 19–21/08/2006      | 180     | 2.3±0.3     | 7.7±3.4    | Fu et al., 2008   |
|                                      | Broadleaf Forest        | 2500     | Remote        | 30–31/08/2007      | 160     | 2.0±0.6     | 0.5±1.8    | Fu et al., 2008   |
|                                      | Pine forest             | 3050     | Remote        | 31/08–1/09/2008    | 80      | 1.6±0.6     | 2.9±2      | Fu et al., 2008   |
| Mount Gongga, Sichuan (Subtropical)  | Evergreen broadleaf     | 3000     | Remote        | 17/8/2006–1/9/2013 |         | 4.7         | 1.6        | Fu et al., 2010a  |
| Mt. Simian, Chongqing (Subtropical)  | Evergreen broadleaf     | 1394     | Rural         | 19/8/2003          | 174     | 19.9±8.6    | 7.7±3.9    | Wang et al., 2006 |
| Mt. Jinyun, Chongqing (Subtropical)  | Evergreen broadleaf     | 900      | Rural         | 9/15/2003          | 137     | 9.9±1.8     | 3.4±1.5    | Wang et al., 2006 |
| Mt. Gele, Chongqing (Subtropical)    | Evergreen broadleaf     | 600      | Rural         | 6/1/2003           | 196     | 14.1±3      | 8.4±2.5    | Wang et al., 2006 |
| Mt. Jinyun, Chongqing (Subtropical)  | Mixed broadleaf-conifer | 900      | Rural         | 4/2012–1/2013      |         |             | 14.2±10.9  | Ma et al., 2015   |
|                                      | Shrub                   | 900      | Rural         | 5/2012–1/2013      |         |             | 16.9±13.3  | Ma et al., 2015   |
|                                      | Bamboo                  | 900      | Rural         | 4/2012–2/2013      |         |             | 17.8±14.2  | Ma et al., 2015   |
|                                      | Deciduous broadleaf     | 900      | Rural         | 4/2012–2/2013      |         |             | 12.2±10.7  | Ma et al., 2015   |
| Mt. Jinyun, Chongqing (Subtropical)  | Mixed broadleaf-conifer | 900      | Rural         | 4/2011–3/2012      | 140     |             | 14.2±6.7   | Ma et al., 2014   |
| Mt. Simian, Chongqing (Subtropical)  | Deciduous broadleaf     | 1394     | Rural         | 3/2012–2/2013      | 161     |             | 12.12±10.7 | Ma et al., 2016   |
| Qianyanzhou, Jiangxi (Subtropical)   | Evergreen coniferous    | 60       | Rural         | 11/2013–12/2014    | 101     | 3.6         | 2.1        | Luo et al., 2015a |
| Tieshanping, Chongqing (Subtropical) | Masson pine             | 500      | Suburban      | 03/2014–01/2015    | 219     | 3.6±1.3     | 2.76±3.85  | Zhou et al. 2016c |
|                                      | Masson pine             | 500      | Suburban      | 03/2014–01/2015    | 264     | 3.8±1.3     | 3.52±4.18  | Zhou et al. 2016c |
|                                      | Camphor                 | 500      | Suburban      | 03/2014–01/2015    | 156     | 3.3±1.4     | 0.18±2.24  | Zhou et al. 2016c |
|                                      | Wetland                 | 500      | Suburban      | 03/2014–01/2015    | 96      | 4.9±2       | –0.8±5.05  | Zhou et al. 2016c |
| Tieshanping, Chongqing (Subtropical) | Masson pine             | 500      | Suburban      | 09/2012–07/2013    | 294     | 5.2±2       | 0.3±0.8    | Du et al., 2014   |
| Nanhu, Changchun (Temperate)         | Temperate               |          | Urban         |                    | 143     |             | 7.6        | Fang et al., 2003 |
| Jingyuetan, Changchun (Temperate)    | Temperate               |          | Urban         |                    | 136     |             | 3.3        | Fang et al., 2003 |

---

|                           |       |                  |            |                  |                 |      |      |          |                 |
|---------------------------|-------|------------------|------------|------------------|-----------------|------|------|----------|-----------------|
| Zhuzhou,<br>(Subtropical) | Hunan | Mixed<br>conifer | broadleaf- | Contamin<br>ated | 09/2012–03/2014 | 3190 | 13.8 | 15.3±2.8 | Du et al., 2014 |
|---------------------------|-------|------------------|------------|------------------|-----------------|------|------|----------|-----------------|

---

1031

1032

1033 **Figure captions:**

1034

1035 **Fig. 1.** Contributions to the Hg input fluxes ( $\mu\text{g m}^{-2} \text{yr}^{-1}$ ) to forests from precipitation, throughfall, litterfall and total  
1036 inputs (throughfall + litterfall) in China.

1037 **Fig. 2.** Relationship analysis between the GEM or TGM concentrations verses the litterfall Hg concentrations for  
1038 field trap measurements.

1039 **Fig. 3.** Correlations between litterfall deposition fluxes of Hg and (a) mass-weighted mean (MWM) Hg  
1040 concentrations in litterfall, (b) litterfall biomass.

1041 **Fig. 4.** Box chart for Hg inputs to forest ecosystems in China, Europe and North America.

1042 **Fig. 5.** Box chart for soil-atmosphere Hg exchange fluxes in deciduous and evergreen forest ecosystems in China  
1043 (CHI, including four seasons), North America (NA), Europe (Eur) and Brazil (Bra).

1044 **Fig. 6.** Total mercury budgets ( $\mu\text{g m}^{-2} \text{yr}^{-1}$ ) at the three temperate forest stands of Mt. Dongling (a) and four  
1045 subtropical forests of Tieshanping, Qianyanzhou, Mt. Gongga and Mt. Simian forests.

1046

1047



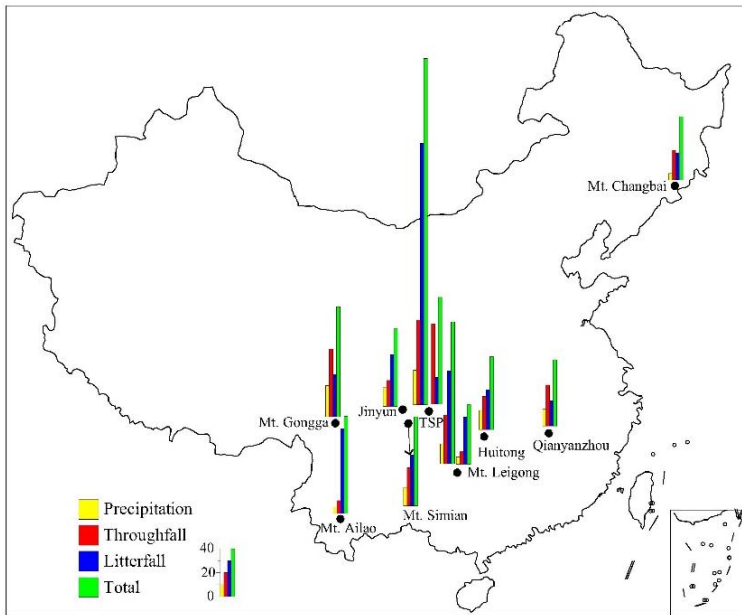

1048  
 1049  
 1050  
 1051  
 1052  
 1053

**Fig. 1.** Contributions to the Hg input fluxes ( $\mu\text{g m}^{-2} \text{yr}^{-1}$ ) to forests from precipitation, throughfall, litterfall and total inputs (throughfall + litterfall) in China. Mt. Ailao, Mt. Leigong, Mt. Gongga and Mt. Changbai are regarded as remote sites and Mt. Jinyun, Mt. Simian, Qianyanzhou, Huitong and Tieshanping (TSP) are regarded as suburban and rural sites.

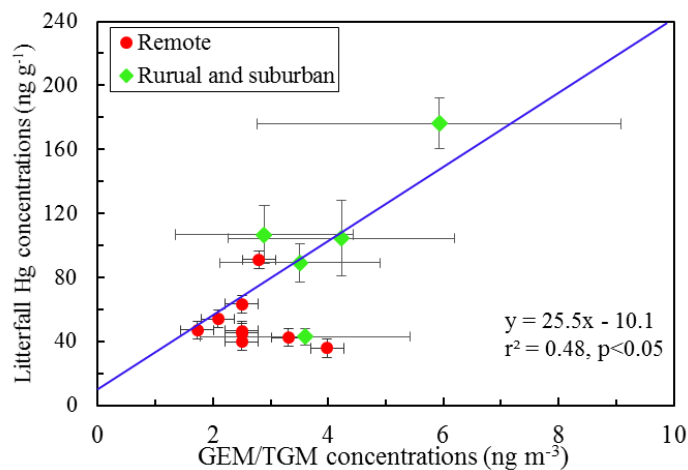

1054

1055

1056

1057

1058

1059

1060

1061

**Fig. 2.** Relationship analysis between the GEM or TGM concentrations versus the litterfall Hg concentrations for field trap measurements. Data were from Mt. Ailao (Zhou et al., 2013a; Zhang et al., 2015), Mt. Leigong (Fu et al., 2010a, b), Mt. Damei (Lang et al., 2015; Yu et al., 2015), Mt. Gongga (Fu et al., 2008a, b), Mt. Changbai (Fu et al., 2016, 2014), Mt. Dongling (Zhou et al., 2017a), Mt. Jinyun (Ma et al., 2015), Mt. Simian (Ma et al., 2016), Qianyanzhou (Luo et al., 2015), Huitong (Luo et al., 2015) and Tieshanping (Zhou et al., 2016a).

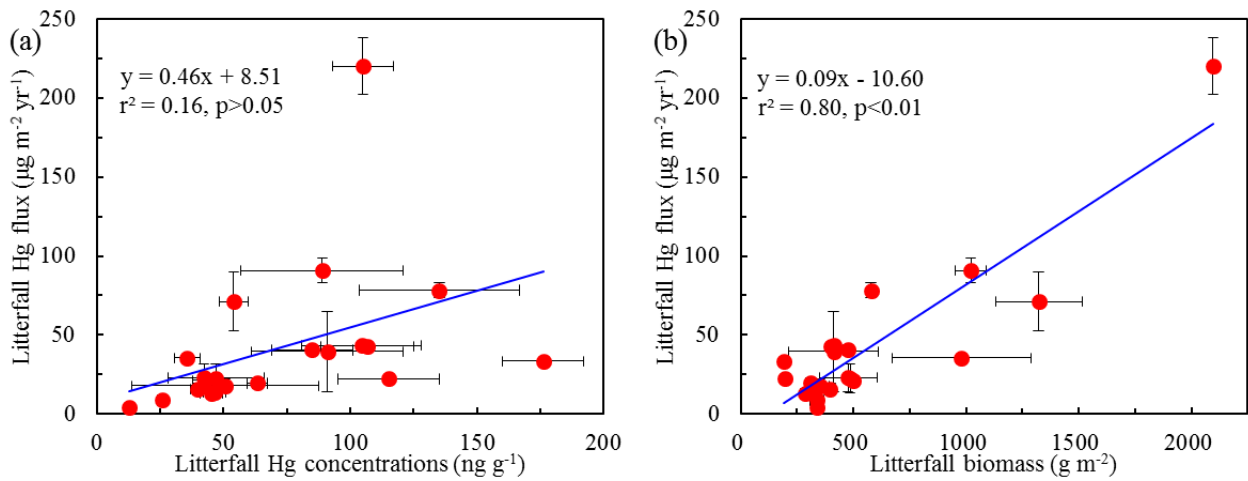

1062

1063

1064

1065

1066

1067

1068

**Fig. 3.** Correlations between litterfall deposition fluxes of Hg and (a) mass-weighted mean (MWM) Hg concentrations in litterfall, (b) litterfall biomass. Data are from Zhou et al., 2013a, 2016a, 2017a; Fu et al., 2010a, b, 2016; Luo et al., 2015a, b; Wang et al., 2009; Gong et al., 2014; Niu et al., 2011; Ma et al., 2015, 2016; Luo et al., 2015a.

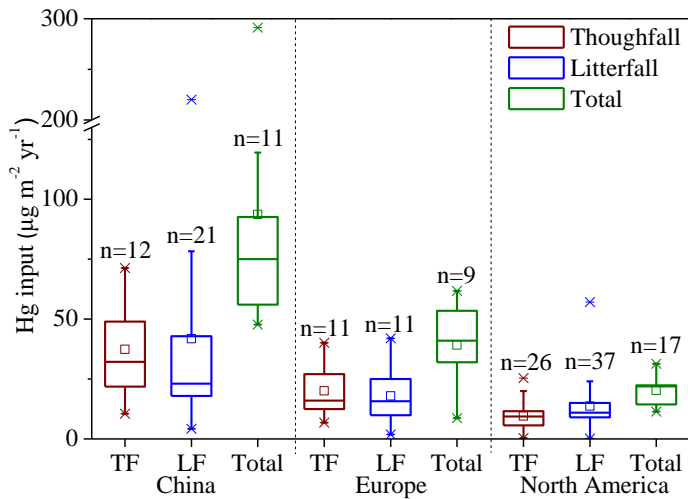

**Fig. 4.** Box chart for Hg inputs to forest ecosystems in China, Europe and North America. “TF” is the throughfall; “LF” is the litterfall; “Total” is the total Hg input (throughfall + litterfall) to the forest ecosystem. Data are from Hultberg et al., 1995; Iverfeldt et al., 1991; Larssen et al., 2008; Lee et al., 2000; Munthe et al., 1995, 1998; Schwesig and Matzner, 2000, 2001; Xiao et al., 1998; Blackwell and Driscoll, 2015a, b; Bushey et al., 2008; Choi et al., 2008; Demers et al., 2007; Kalicin et al., 2008; Kolka, 1999; Grigal et al., 2000; Lindberg et al., 1994, 1996; Fisher and Wolfe, 2012; Friedli et al., 2007; Rea et al., 1996, 2000, 2001; Johnson, 2002, Johnson, et al., 2007; Nelson et al., 2007; St. Louis et al., 2001; Graydon et al., 2008; Juillerat et al., 2012; Obrist et al., 2012; Richardson and Friedland, 2015; Risch et al., 2012; Sheehan et al., 2006; Selvendiran et al., 2008; Zhou et al., 2013a, 2016c, 2017a; Zhang et al., 2015; Lang et al., 2015; Yu et al., 2015; Fu et al., 2008a, b, 2010a, b, 2016, 2014; Ma et al., 2015, 2016; Luo et al., 2015.

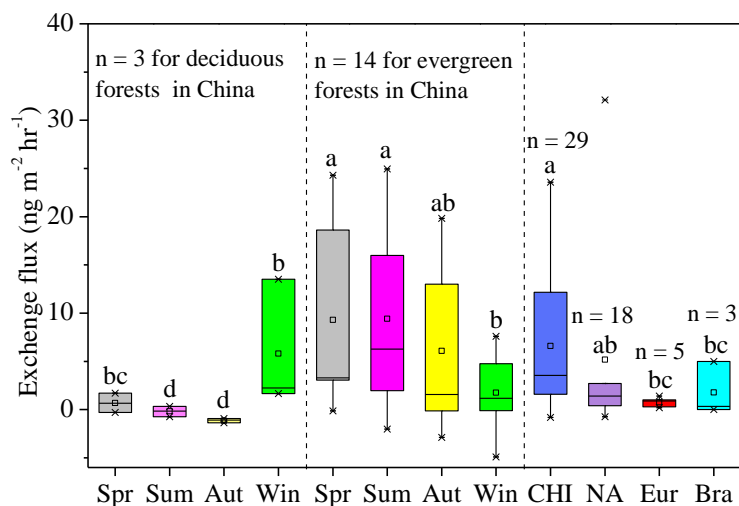

1081

1082

1083

1084

1085

1086

1087

1088

1089

1090

1091

1092

1093

**Fig. 5.** Box chart for soil-atmosphere Hg exchange fluxes in deciduous and evergreen forest ecosystems in China (CHI, including four seasons), North America (NA), Europe (Eur) and Brazil (Bra). “Spr” is spring; “Sum” is summer; “Aut” is autumn; “Win” is winter. The post hoc tests (Tukey’s HSD) were performed at 5% significance level. Data for deciduous forest in China are from Zhou et al. 2016c; for evergreen forests are from Du et al., 2014; Fu et al., 2008c, 2010a; Wang et al., 2006; Ma et al., 2014; Ma et al., 2016; Luo et al. (2015a); Fang et al., 2003; Zhou et al. 2016c; for North America are from Ericksen et al., 2006, Hartman et al., 2009, Carpi and Lindberg, 1998; Kuiken et al., 2008a, b; Lee et al. 2000; Lindberg et al., 1998, 2002; Poissant et al., 2004; Poissant and Casimir, 1998; Carpi et al., 2014; Choi and Holsen, 2009; Zhang et al., 2001; Schroeder et al., 1989; for Europe are from Xiao et al., 1991; Kyllönen et al., 2012; Lindberg et al., 1998; from Brazil are from Almeida et al., 2009; Carpi et al., 2014; Magarelli and Fostier, 2005.

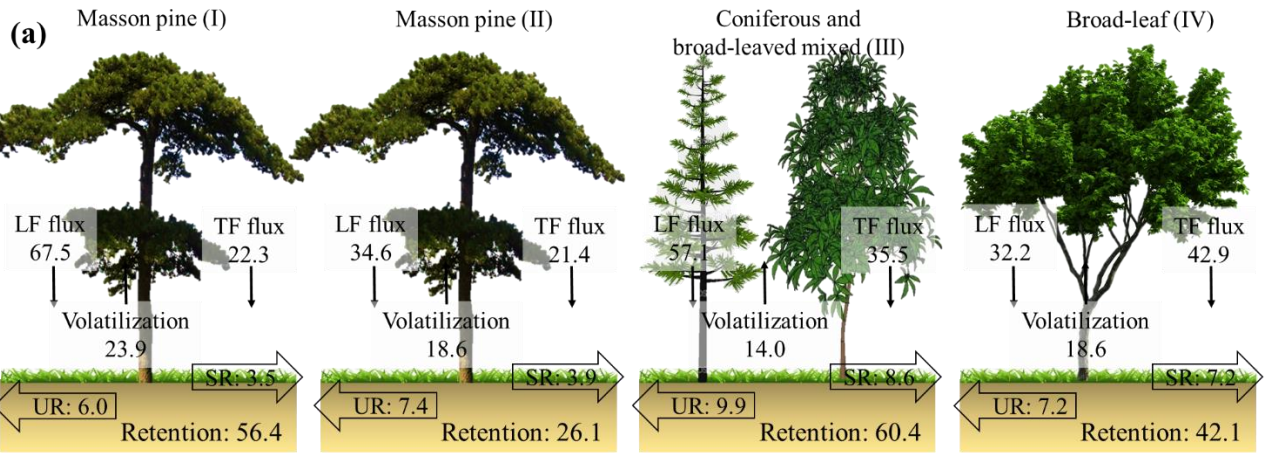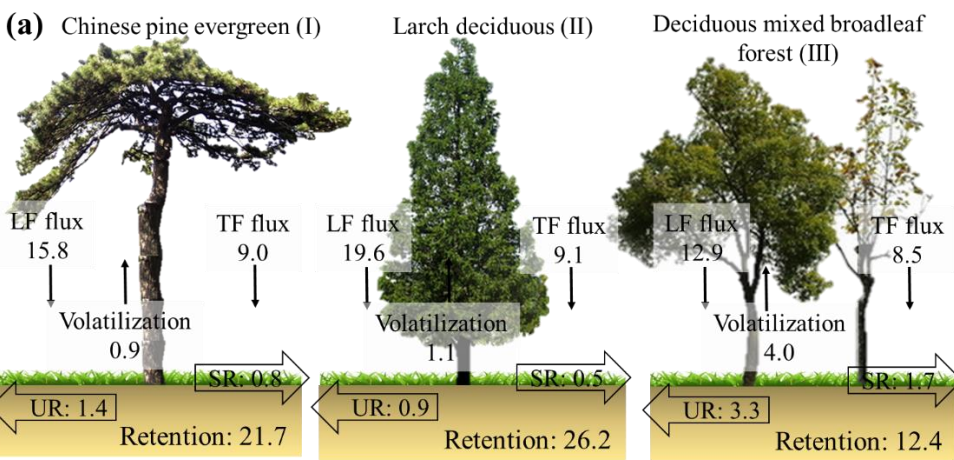

**Fig. 6.** Total mercury budgets ( $\mu\text{g m}^{-2} \text{yr}^{-1}$ ) at the four subtropical forests of Tieshanping (I), Qianyanzhou (II), Mt. Gongga (III) and Mt. Simian forests (IV) (a) and three temperate forest stands of Mt. Dongling (I-III) (b). LF, TF, SR and UR represent litterfall, throughfall, surface runoff and underground runoff fluxes, respectively. Data are from Zhou et al. (2016a, c), Luo et al. (2015b), Wang et al. (2009), Luo et al. (2015a), Fu et al. (2010a), Ma et al., 2016.
